# Supplementary material for: Achieving white light emission and increased magnetic anisotropy by transition metal substitution in functional materials based on dinuclear DyIII(4-pyridone)[MIII(CN)6]3− (M = Co, Rh) molecules
Source: Royal Society of Chemistry journal article supplement (doi:10.1039/c7tc03963h), 2017-11-18
Supplement: c7tc03963h1.pdf [file c7tc03963h1.pdf]

## Supporting Information

### Achieving white light emission and increased magnetic anisotropy by transition metal substitution in functional materials based on dinuclear Dy<sup>III</sup>(4-pyridone)[M<sup>III</sup>(CN)<sub>6</sub>]<sup>3-</sup> (M = Co, Rh) molecules

Junhao Wang,<sup>a</sup> Szymon Chorazy,<sup>\*,b</sup> Koji Nakabayashi,<sup>a</sup> Barbara Sieklucka<sup>b</sup> and Shin-ich Ohkoshi,<sup>\*,a</sup>

<sup>a</sup>Department of Chemistry, School of Science, The University of Tokyo, 7-3-1 Hongo, Bunkyo-ku, Tokyo 113-0033, Japan.

<sup>b</sup>Faculty of Chemistry, Jagiellonian University, Gronostajowa 2, 30-387 Kraków, Poland.

\*Corresponding authors: ohkoshi@chem.s.u-tokyo.ac.jp; simon.chorazy@uj.edu.pl

|                                                                                                                                                                                                     |     |
|-----------------------------------------------------------------------------------------------------------------------------------------------------------------------------------------------------|-----|
| Infrared spectrum of <b>1</b> compared with the related spectrum of 4-hydroxypyridine. (Figure S1)                                                                                                  | S2  |
| Thermogravimetric curves for <b>1</b> , <b>1md</b> and <b>2</b> , with the comment. (Figure S2)                                                                                                     | S3  |
| Infrared spectrum of <b>2</b> compared with the related spectra of 4-hydroxypyridine and K <sub>3</sub> [Rh <sup>III</sup> (CN) <sub>6</sub> ]. (Figure S3)                                         | S5  |
| Crystal data and structure refinement of <b>1</b> and <b>2</b> . (Table S1)                                                                                                                         | S6  |
| Detailed structural parameters of <b>1</b> . (Table S2)                                                                                                                                             | S7  |
| Detailed structural parameters of <b>2</b> . (Table S3)                                                                                                                                             | S8  |
| The structural views showing the formation of the three-dimensional supramolecular network of <b>1</b> . (Figure S4)                                                                                | S9  |
| Results of Continuous Shape Measure Analysis for [Dy <sup>III</sup> (4-pyridone) <sub>4</sub> (μ-NC)(H <sub>2</sub> O) <sub>2</sub> ] <sup>2+</sup> complexes in <b>1</b> and <b>2</b> . (Table S4) | S10 |
| Detailed insight into the geometry of [Dy <sup>III</sup> (4-pyridone) <sub>4</sub> (μ-NC)(H <sub>2</sub> O) <sub>2</sub> ] <sup>2+</sup> complexes in <b>1</b> and <b>2</b> . (Figure S5)           | S10 |
| The spatial arrangement of dinuclear molecules in the supramolecular networks of <b>1</b> and <b>2</b> . (Figure S6)                                                                                | S11 |
| The noncovalent interactions between dinuclear molecules in the supramolecular networks of <b>1</b> and <b>2</b> . (Figure S7)                                                                      | S12 |
| Powder X-ray diffraction patterns of <b>1</b> , <b>1md</b> and <b>2</b> . (Figure S8)                                                                                                               | S13 |
| Solid state UV-vis-NIR absorption spectra of <b>1</b> compared with the spectra of 4-pyridone and K <sub>3</sub> [Co <sup>III</sup> (CN) <sub>6</sub> ]. (Figure S9)                                | S14 |
| Analysis of solid state UV-vis-NIR absorption spectrum of <b>1</b> compared with the reference spectra. (Table S5)                                                                                  | S15 |
| Solid state UV-vis-NIR absorption spectra of <b>2</b> compared with the spectra of 4-pyridone and K <sub>3</sub> [Rh <sup>III</sup> (CN) <sub>6</sub> ]. (Figure S10)                               | S16 |
| Analysis of solid state UV-vis-NIR absorption spectrum of <b>2</b> compared with the reference spectra. (Table S6)                                                                                  | S17 |
| Solid state UV-vis emission spectra of <b>1</b> excited by various indicated UV wavelengths. (Figure S11)                                                                                           | S18 |
| Summary of <i>xy</i> parameters of the CIE 1931 chromaticity scale for the emission colours of <b>1</b> . (Table S7)                                                                                | S19 |
| Solid state UV-vis emission spectra of <b>2</b> excited by various indicated UV wavelengths. (Figure S12)                                                                                           | S20 |
| Summary of <i>xy</i> parameters of the CIE 1931 chromaticity scale for the emission colours of <b>2</b> . (Table S8)                                                                                | S21 |
| Room temperature solid state UV-vis emission and excitation spectra of K <sub>3</sub> [Rh(CN) <sub>6</sub> ]. (Figure S13)                                                                          | S22 |
| Direct-current ( <i>dc</i> ) magnetic characteristics of <b>1md</b> with the comment concerning the preparation of <b>1md</b> . (Figure S14)                                                        | S23 |
| Field dependences of molar magnetization of <b>1</b> and <b>2</b> , <i>M</i> , at the temperatures from the 2–4 K range. (Figures S15 and S16)                                                      | S25 |
| Full <i>ac</i> magnetic characteristics of <b>1</b> under zero <i>dc</i> field and under <i>dc</i> field of 1000 Oe. (Figures S17 and S18)                                                          | S26 |
| Fitting parameters of <b>1</b> using generalized Debye model for <i>ac</i> magnetism under <i>H</i> <sub>dc</sub> = 0 Oe and <i>H</i> <sub>dc</sub> = 1 kOe. (Table S9)                             | S28 |
| Full <i>ac</i> magnetic characteristics of <b>2</b> under zero <i>dc</i> field and under <i>dc</i> field of 1000 Oe. (Figures S19 and S20)                                                          | S29 |
| Fitting parameters of <b>2</b> using generalized Debye model for <i>ac</i> magnetism under <i>H</i> <sub>dc</sub> = 0 Oe and <i>H</i> <sub>dc</sub> = 1 kOe. (Table S10)                            | S31 |
| Full <i>ac</i> magnetic characteristics of <b>1md</b> under zero <i>dc</i> field and under <i>dc</i> field of 1000 Oe. (Figures S21 and S22)                                                        | S32 |
| Fitting parameters of <b>1md</b> using generalized Debye model for <i>ac</i> magnetism under <i>H</i> <sub>dc</sub> = 0 Oe and <i>H</i> <sub>dc</sub> = 1000 Oe. (Table S11)                        | S34 |
| References to Supporting Information.                                                                                                                                                               | S35 |

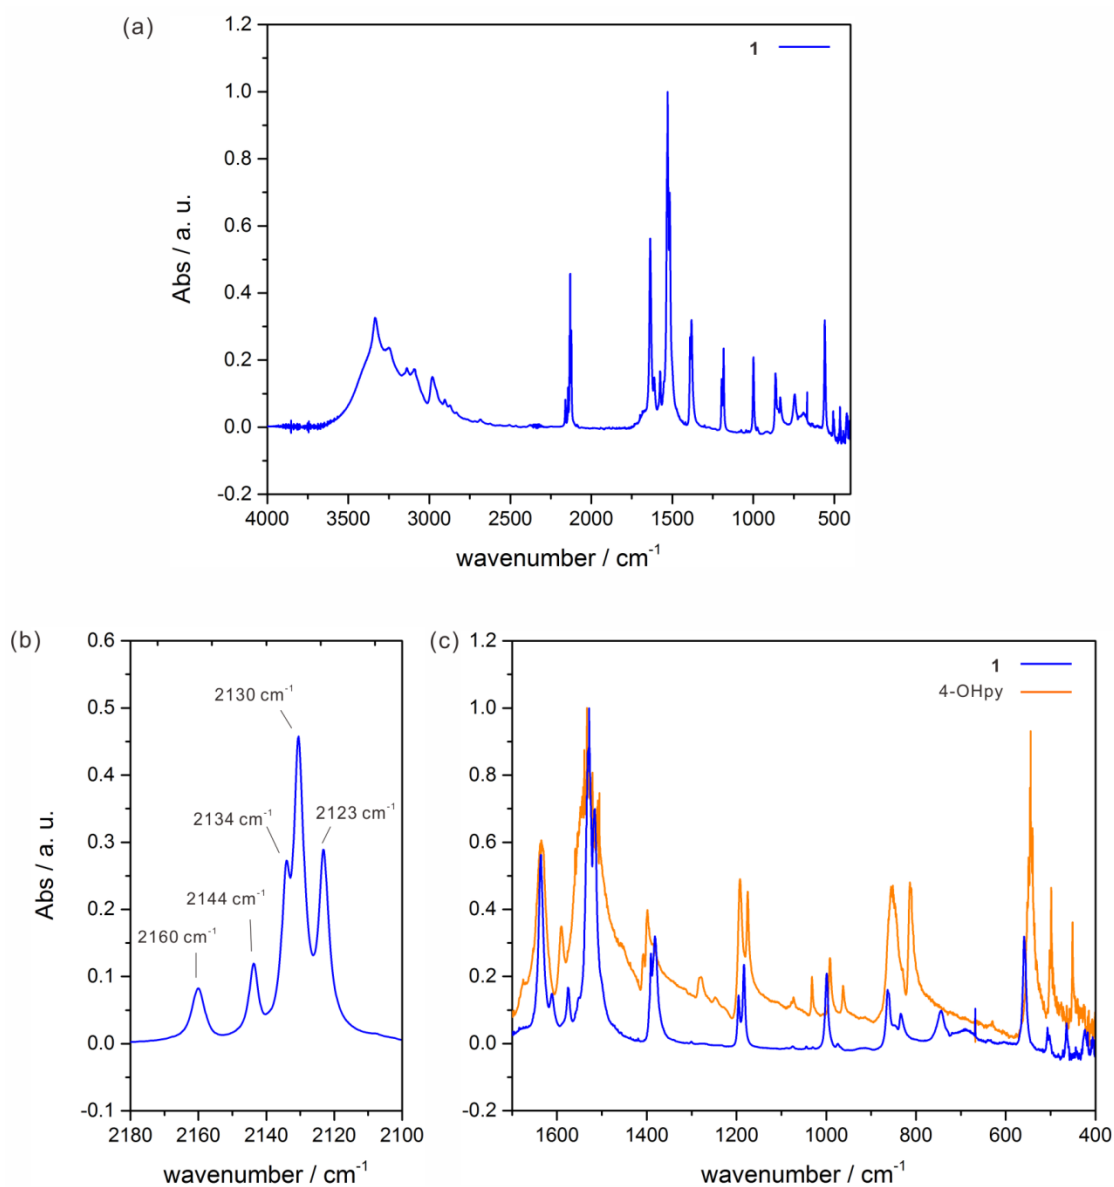

**Figure S1** Infrared absorption spectrum of **1** (blue line): (a) the whole wavenumber measurement scope of 4000-400  $\text{cm}^{-1}$ , (b) the 2180-2100  $\text{cm}^{-1}$  part of the spectrum showing the stretching vibrations of cyanides, and (c) the 1700-400  $\text{cm}^{-1}$  part of the spectrum showing the vibrations of the 4-pyridone organic ligand. The characteristic absorption peaks for free 4-hydroxypyridine was presented for the comparison in (c) (orange line).

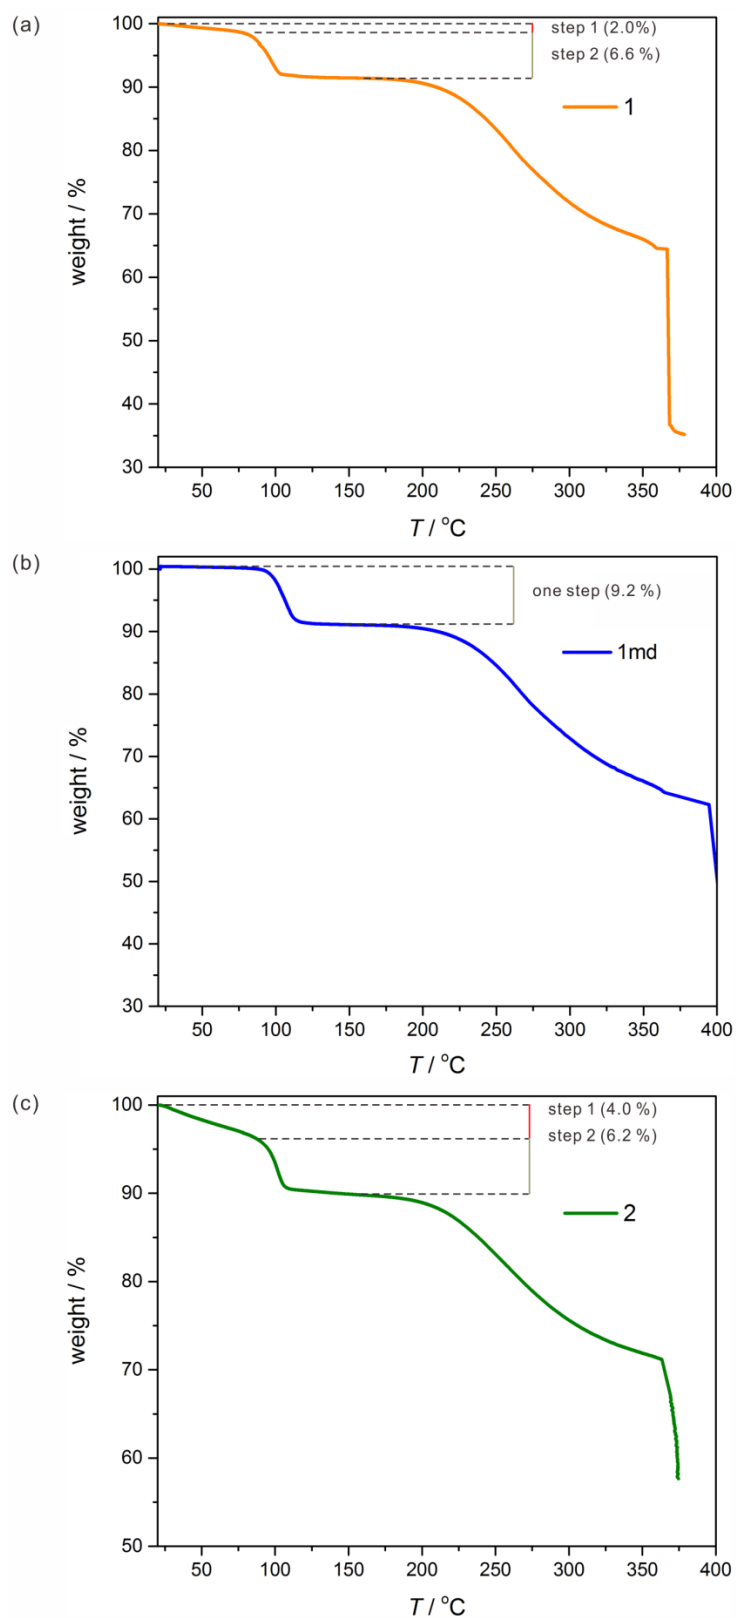

**Figure S2** Thermogravimetric curves measured under an air atmosphere in the temperature range of 20-400 °C of **1** (a), magnetically diluted **1md** (b, see description below Figure S13 for details), and **2** (c), with the indicated steps related to the loss of water molecules on heating process (see the comment on the next page).

## Comment to Figure S2

Figure S2 (a): on the heating process from 20 °C to 83 °C (step 1) the gradual decrease of mass of **1** from 100 % to 98.0 % (weight loss of 2.0 %, step 1) corresponds to the removal of weakly bonded, non-coordinated water molecules in the amount of one molecule per one  $\{\text{Dy}^{\text{III}}\text{Co}^{\text{III}}\}$  unit (calcd. 2.2 %). Further heating leads to the abrupt decrease in the narrow temperature range of 85-105 °C from 98.0 % to 91.4 % (weight loss of 6.6 %, step 2) which is ascribed to the removal of hydrogen bonded water molecules in the amount of one, and two coordinated water molecules per one  $\{\text{Dy}^{\text{III}}\text{Co}^{\text{III}}\}$  unit (calcd. 6.5 %). Therefore, the two found steps of weight loss in TGA curve is in good agreement with the composition of **1**,  $[\text{Dy}^{\text{III}}(4\text{-pyridone})_4(\text{H}_2\text{O})_2][\text{Co}^{\text{III}}(\text{CN})_6]\cdot 2\text{H}_2\text{O}$ , determined by the CHN elemental analysis. The subsequent plateau in the TGA curve indicates the further stability of the dehydrated phase in the presumable formula of  $\{[\text{Dy}^{\text{III}}(4\text{-pyridone})_4][\text{Co}^{\text{III}}(\text{CN})_6]\}$  up to 185 °C.

Figure S2 (b): on the heating process from 20 °C to 90 °C, **1md** was survived without any decrease of mass. Further heating leads to the abrupt decrease in the narrow temperature range of 90-116 °C from 100 % to 90.8 % (weight loss of 9.2 %, one) which correspond to the simultaneous removal of two crystallization, and two coordinated water molecules per one  $\{\text{Dy}^{\text{III}}_{0.12}\text{Y}^{\text{III}}_{0.88}\text{Co}^{\text{III}}\}$  unit (calcd. 9.4 %). Therefore, the found one step of weight loss in TGA curve is in good agreement with the composition of **1md**,  $[(\text{Dy}^{\text{III}}_{0.12}\text{Y}^{\text{III}}_{0.88})(4\text{-pyridone})_4(\text{H}_2\text{O})_2][\text{Co}^{\text{III}}(\text{CN})_6]\cdot 2\text{H}_2\text{O}$ , determined by the CHN elemental analysis. The subsequent plateau in the TGA curve indicates the thermal stability of the dehydrated phase in the presumable formula of  $\{[\text{Dy}_{0.12}\text{Y}_{0.88}^{\text{III}}(4\text{-pyridone})_4][\text{Co}_{0.88}^{\text{III}}(\text{CN})_6]\}$  up to 190 °C.

Figure S2 (c): on the heating process from 20 °C to 89 °C (step 1) the gradual decrease of mass of **2** from 100 % to 96.0 % (weight loss of 4.0 %, step 1) corresponds to the removal of three weakly-bonded, non-coordinated water molecules per one  $\{\text{Dy}^{\text{III}}\text{Rh}^{\text{III}}\}$  unit (calcd. 4.0 %). Further heating leads to the abrupt decrease in the narrow temperature range of 89-110 °C from 96.0 % to 89.8 % (weight loss of 6.2 %, step 2) which is ascribed to the removal of one crystallization water molecules, and two coordinated water molecules per one  $\{\text{Dy}^{\text{III}}\text{Rh}^{\text{III}}\}$  unit (calcd. 6.2 %). Therefore, the two found steps of weight loss in TGA curve agree well with the composition of **2**,  $\{[\text{Dy}^{\text{III}}(4\text{-pyridone})_4\cdot(\text{H}_2\text{O})_2][\text{Rh}^{\text{III}}(\text{CN})_6]\}\cdot 4\text{H}_2\text{O}$ , determined by the CHN elemental analysis. The subsequent plateau in the TGA curve indicates the survival of the dehydrated phase in the presumable formula of  $\{[\text{Dy}^{\text{III}}(4\text{-pyridone})_4][\text{Rh}^{\text{III}}(\text{CN})_6]\}$  up to 194 °C.

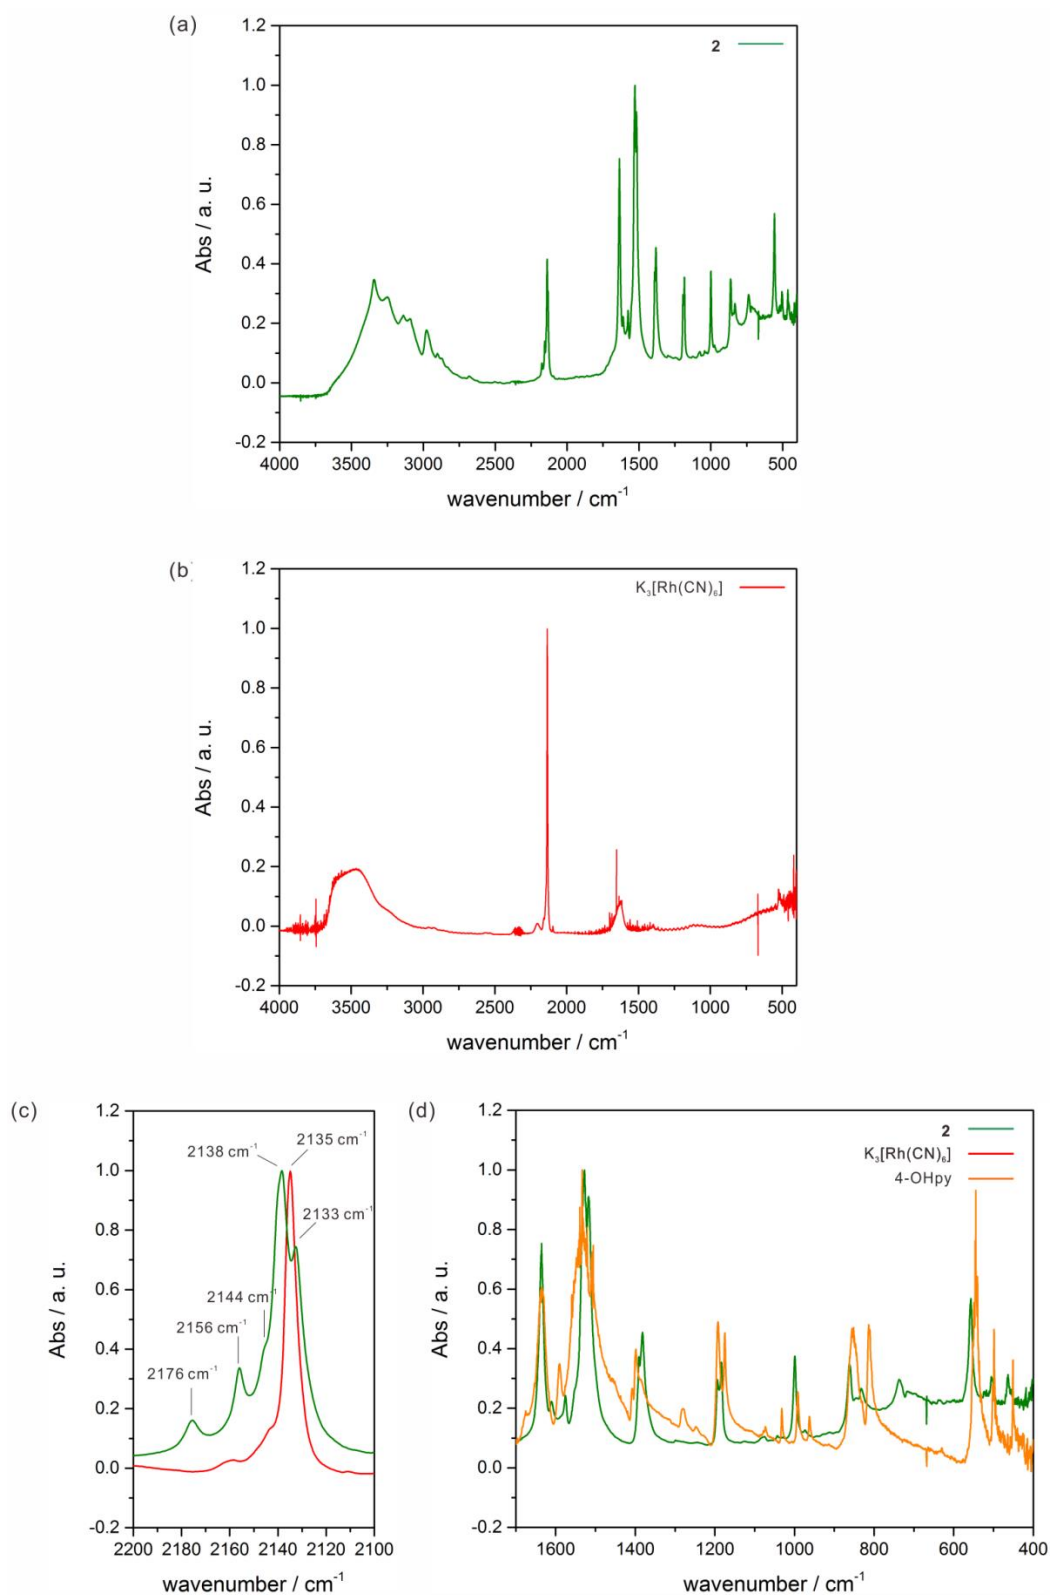

**Figure S3** Infrared absorption spectrum of **2** (green line) in the 4000-400 cm<sup>-1</sup> range (a) confronted with the related spectrum for the starting material, K<sub>3</sub>[Rh<sup>III</sup>(CN)<sub>6</sub>] (red line) (b), and the detailed comparison views: (c) between **2** and K<sub>3</sub>[Rh<sup>III</sup>(CN)<sub>6</sub>] in the limited 2200-2100 cm<sup>-1</sup> range of the stretching vibrations of cyanides, and (d) between **2** and free 4-hydroxypyridine in the limited 1700-400 cm<sup>-1</sup> range.

**Table S1** Crystal data and structure refinement of **1** and **2**.

| compound                                   |                | <b>1</b>                                                                                                           | <b>2</b>                                                                                                           |
|--------------------------------------------|----------------|--------------------------------------------------------------------------------------------------------------------|--------------------------------------------------------------------------------------------------------------------|
| method                                     |                | single-crystal XRD                                                                                                 | single-crystal XRD                                                                                                 |
| formula                                    |                | Dy <sub>1</sub> Co <sub>1</sub> C <sub>26</sub> H <sub>28</sub> O <sub>8</sub> N <sub>10</sub>                     | Dy <sub>1</sub> Rh <sub>1</sub> C <sub>26</sub> H <sub>28</sub> O <sub>8</sub> N <sub>10</sub>                     |
| formula weight [g·mol <sup>-1</sup> ]      |                | 830.01                                                                                                             | 873.99                                                                                                             |
| <i>T</i> [K]                               |                | 90(2)                                                                                                              | 90(2)                                                                                                              |
| $\lambda$ [Å]                              |                | 0.71075 (Mo K $\alpha$ )                                                                                           | 0.71075 (Mo K $\alpha$ )                                                                                           |
| crystal system                             |                | orthorhombic                                                                                                       | orthorhombic                                                                                                       |
| space group                                |                | Cmc2 <sub>1</sub> (No. 36)                                                                                         | Cmc2 <sub>1</sub> (No. 36)                                                                                         |
| unit cell                                  | <i>a</i> [Å]   | 14.8064(6)                                                                                                         | 14.8508(9)                                                                                                         |
|                                            | <i>b</i> [Å]   | 14.9660(4)                                                                                                         | 15.1527(10)                                                                                                        |
|                                            | <i>c</i> [Å]   | 14.0417(4)                                                                                                         | 14.0756(10)                                                                                                        |
|                                            | $\alpha$ [deg] | 90                                                                                                                 | 90                                                                                                                 |
|                                            | $\beta$ [deg]  | 90                                                                                                                 | 90                                                                                                                 |
|                                            | $\gamma$ [deg] | 90                                                                                                                 | 90                                                                                                                 |
| flack parameter                            |                | 0.493(8)                                                                                                           | 0.45(2)                                                                                                            |
| <i>V</i> [Å <sup>3</sup> ]                 |                | 3111.54(18)                                                                                                        | 3167.4(4)                                                                                                          |
| <i>Z</i>                                   |                | 4                                                                                                                  | 4                                                                                                                  |
| calculated density [g·cm <sup>-3</sup> ]   |                | 1.772                                                                                                              | 1.833                                                                                                              |
| absorption coefficient [mm <sup>-1</sup> ] |                | 2.980                                                                                                              | 2.925                                                                                                              |
| <i>F</i> (100)                             |                | 1644.0                                                                                                             | 1716.0                                                                                                             |
| crystal size [mm × mm × mm]                |                | 0.364 × 0.376 × 0.119                                                                                              | 0.058 × 0.067 × 0.201                                                                                              |
| $\theta$ range [deg]                       |                | (3.085, 27.471)                                                                                                    | (3.054, 27.478)                                                                                                    |
| limiting indices                           |                | -19 < <i>h</i> < 19<br>-19 < <i>k</i> < 17<br>-19 < <i>l</i> < 18                                                  | -19 < <i>h</i> < 17<br>-19 < <i>k</i> < 19<br>-18 < <i>l</i> < 18                                                  |
| collected reflections                      |                | 14956                                                                                                              | 24918                                                                                                              |
| unique reflections                         |                | 3699                                                                                                               | 3759                                                                                                               |
| <i>R</i> <sub>int</sub>                    |                | 0.0126                                                                                                             | 0.0831                                                                                                             |
| completeness                               |                | 1.91/1.00                                                                                                          | 1.92/1.00                                                                                                          |
| max. and min. transmission                 |                | 0.755 and 0.923                                                                                                    | 0.755 and 0.879                                                                                                    |
| refinement method                          |                | full-matrix least squares on <i>F</i> <sup>2</sup>                                                                 | full-matrix least squares on <i>F</i> <sup>2</sup>                                                                 |
| data/restraints/parameters                 |                | 3699/98/324                                                                                                        | 3759/122/323                                                                                                       |
| GOF on <i>F</i> <sup>2</sup>               |                | 0.895                                                                                                              | 1.101                                                                                                              |
| final <i>R</i> indices                     |                | <i>R</i> <sub>1</sub> = 0.0145 [ <i>I</i> > 2 $\sigma$ ( <i>I</i> )]<br><i>wR</i> <sub>2</sub> = 0.0288 (all data) | <i>R</i> <sub>1</sub> = 0.0456 [ <i>I</i> > 2 $\sigma$ ( <i>I</i> )]<br><i>wR</i> <sub>2</sub> = 0.0689 (all data) |
| largest diff peak and hole                 |                | 0.479 and -0.758 e·Å <sup>-3</sup>                                                                                 | 1.136 and -2.379 e·Å <sup>-3</sup>                                                                                 |

**Table S2** Detailed structural parameters of **1**.

| [Dy <sup>III</sup> (4-pyridone) <sub>4</sub> (μ-NC)(H <sub>2</sub> O) <sub>2</sub> ] <sup>2+</sup><br>complex |              | [Co <sup>III</sup> (CN) <sub>6</sub> ] <sup>3-</sup> complex |              |
|---------------------------------------------------------------------------------------------------------------|--------------|--------------------------------------------------------------|--------------|
| parameter                                                                                                     | value [Å, °] | parameter                                                    | value [Å, °] |
| Dy1-O1                                                                                                        | 2.402(2)     | Co1-C1                                                       | 1.891(3)     |
| Dy1-O2                                                                                                        | 2.298(17)    | Co1-C2                                                       | 1.902(4)     |
| Dy1-O3                                                                                                        | 2.266(18)    | Co1-C3                                                       | 1.903(16)    |
| Dy1-O4                                                                                                        | 2.242(14)    | Co1-C4                                                       | 1.899(15)    |
| Dy1-O5                                                                                                        | 2.232(15)    | Co1-C5a                                                      | 1.815(17)    |
| Dy1-N1                                                                                                        | 2.483(3)     | Co1-C5b                                                      | 1.980(12)    |
| C1-N1-Dy1                                                                                                     | 175.9(17)    | C1-N1                                                        | 1.1528       |
| O4-Dy1-O1                                                                                                     | 75.0(4)      | C2-N2                                                        | 1.1443       |
| O4-Dy1-O1                                                                                                     | 97.1(6)      | C3-N3                                                        | 1.1011       |
| O4-Dy1-O3                                                                                                     | 89.65        | C4-N4                                                        | 1.1973       |
| O4-Dy1-N1                                                                                                     | 95.3(6)      | C5a-N5a                                                      | 1.3145       |
| O4-Dy1-O2                                                                                                     | 93.9(6)      | C5b-N5b                                                      | 1.0377       |
| O5-Dy1-N1                                                                                                     | 97.7(6)      | N1-C1-Co1                                                    | 176(2)       |
| O5-Dy1-O2                                                                                                     | 88.87        | C1-Co1-C3                                                    | 91.3(8)      |
| O5-Dy1-O1                                                                                                     | 93.4(6)      | C1-Co1-C4                                                    | 89.4(8)      |
| O5-Dy1-O1                                                                                                     | 72.6(6)      | C1-Co1-C5a                                                   | 89.7(6)      |
| O5-Dy1-O3                                                                                                     | 95.2(6)      | C1-Co1-C5b                                                   | 89.4(4)      |
| N1-Dy1-O2                                                                                                     | 74.3(4)      | C2-Co1-C3                                                    | 89.3(8)      |
| O2-Dy1-O1                                                                                                     | 72.2(4)      | C2-Co1-C4                                                    | 90.1(8)      |
| O1-Dy1-O1                                                                                                     | 71.32(11)    | C2-Co1-C5a                                                   | 90.2(6)      |
| O1-Dy1-O3                                                                                                     | 75.0(4)      | C2-Co1-C5b                                                   | 90.7(4)      |
| O3-Dy1-N1                                                                                                     | 71.7(4)      | Co1-C1-N1                                                    | 176(2)       |
| O2-Dy1-O1                                                                                                     | 137.6(5)     | Co1-C2-N2                                                    | 180(2)       |
| O2-Dy1-O3                                                                                                     | 146          | Co1-C3-N3                                                    | 179.7(15)    |
| O1-Dy1-O3                                                                                                     | 140.8(5)     | Co1-C4-N4                                                    | 179.1(14)    |
| O1-Dy1-N1                                                                                                     | 144.33(6)    | Co1-C5a-N5a                                                  | 174.1(19)    |
| O4-Dy1-O5                                                                                                     | 166.94       | Co1-C5b-N5b                                                  | 176.5(15)    |
| N1-Dy1-O1                                                                                                     | 144.33(6)    | Co1-Dy1 (C1-N1)                                              | 5.525        |

**Table S3** Detailed structural parameters of **2**.

| [Dy <sup>III</sup> (4-pyridone) <sub>4</sub> (μ-NC)(H <sub>2</sub> O) <sub>2</sub> ] <sup>2+</sup><br>complex |              | [Rh <sup>III</sup> (CN) <sub>6</sub> ] <sup>3-</sup> complex |              |
|---------------------------------------------------------------------------------------------------------------|--------------|--------------------------------------------------------------|--------------|
| parameter                                                                                                     | value [Å, °] | parameter                                                    | value [Å, °] |
| Dy1-O1                                                                                                        | 2.393(6)     | Rh1-C1                                                       | 1.966(12)    |
| Dy1-O2                                                                                                        | 2.35(3)      | Rh1-C2                                                       | 2.076(12)    |
| Dy1-O3                                                                                                        | 2.24(3)      | Rh1-C3                                                       | 2.05(4)      |
| Dy1-O4                                                                                                        | 2.26(3)      | Rh1-C4                                                       | 2.00(3)      |
| Dy1-O5                                                                                                        | 2.21(3)      | Rh1-C5a                                                      | 2.09(4)      |
| Dy1-N1                                                                                                        | 2.461(10)    | Rh1-C5b                                                      | 1.95(4)      |
| C1-N1-Dy1                                                                                                     | 167.84       | C1-N1                                                        | 1.224        |
| O4-Dy1-O1                                                                                                     | 79.9(7)      | C2-N2                                                        | 1.073        |
| O4-Dy1-O1                                                                                                     | 100.2(7)     | C3-N3                                                        | 1.206        |
| O4-Dy1-O3                                                                                                     | 89.47        | C4-N4                                                        | 1.064        |
| O4-Dy1-N1                                                                                                     | 95.8(10)     | C5a-N5a                                                      | 1.057        |
| O4-Dy1-O2                                                                                                     | 96.4(10)     | C5b-N5b                                                      | 1.256        |
| O5-Dy1-N1                                                                                                     | 93.4(10)     | N1-C1-Rh1                                                    | 165(2)       |
| O5-Dy1-O2                                                                                                     | 88.59        | C1-Rh1-C3                                                    | 96.5(12)     |
| O5-Dy1-O1                                                                                                     | 94.2(7)      | C1-Rh1-C4                                                    | 84.3(12)     |
| O5-Dy1-O1                                                                                                     | 70.6(8)      | C1-Rh1-C5a                                                   | 87.2(10)     |
| O5-Dy1-O3                                                                                                     | 91.0(12)     | C1-Rh1-C5b                                                   | 92.2(11)     |
| N1-Dy1-O2                                                                                                     | 75.0(8)      | C2-Rh1-C3                                                    | 90.2(14)     |
| O2-Dy1-O1                                                                                                     | 70.3(7)      | C2-Rh1-C4                                                    | 89.0(14)     |
| O1-Dy1-O1                                                                                                     | 70.5(3)      | C2-Rh1-C5a                                                   | 92.1(9)      |
| O1-Dy1-O3                                                                                                     | 77.4(9)      | C2-Rh1-C5b                                                   | 88.6(11)     |
| O3-Dy1-N1                                                                                                     | 71.1(9)      | Rh1-C1-N1                                                    | 165(2)       |
| O2-Dy1-O1                                                                                                     | 133.6(8)     | Rh1-C2-N2                                                    | 180(4)       |
| O2-Dy1-O3                                                                                                     | 146.02       | Rh1-C3-N3                                                    | 175(3)       |
| O1-Dy1-O3                                                                                                     | 143.5(9)     | Rh1-C4-N4                                                    | 174(3)       |
| O1-Dy1-N1                                                                                                     | 144.3(2)     | Rh1-C5a-N5a                                                  | 177(3)       |
| O4-Dy1-O5                                                                                                     | 170.4        | Rh1-C5b-N5b                                                  | 171(4)       |
| N1-Dy1-O1                                                                                                     | 144.3(2)     | Dy1-Rh1                                                      | 5.624        |



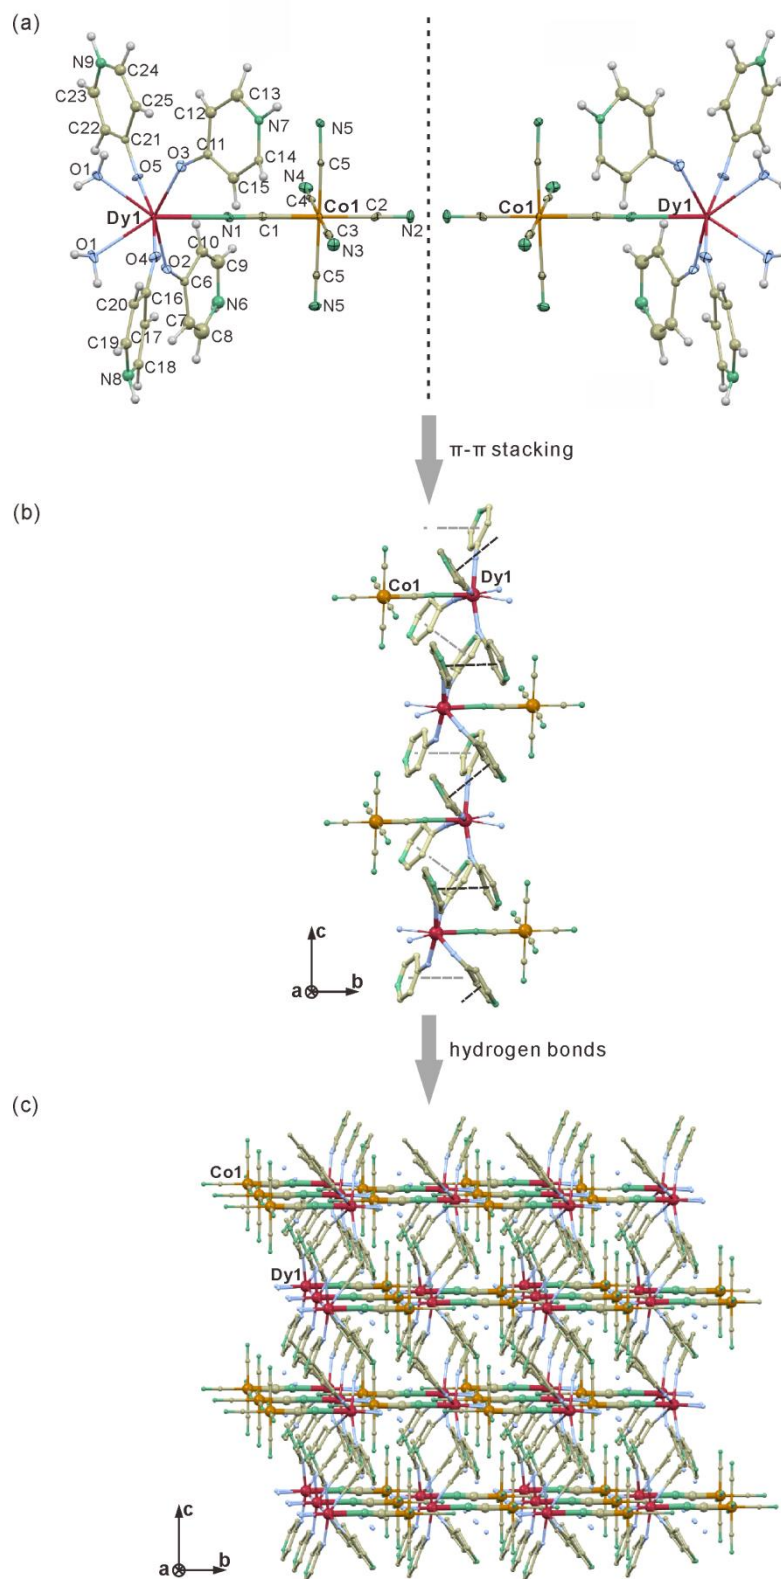

**Figure S4** The structural views showing the formation of the three-dimensional supramolecular network of **1**: (a) the mirror-imaged enantiomers of dinuclear molecules coexisting in the crystal structure, (b) one-dimensional supramolecular chain along *c* direction stabilized by  $\pi$ - $\pi$  interactions indicated by dashed lines, and (c) the three-dimensional supramolecular network presented within the *bc* crystallographic plane. The crystal structure of **2** is analogous to the presented above for **1**, with Rh<sup>III</sup> replacing the Co<sup>III</sup> metal center.

**Table S4** Results of Continuous Shape Measure Analysis for  $[\text{Dy}^{\text{III}}(4\text{-pyridone})_4(\mu\text{-NC})(\text{H}_2\text{O})_2]^{2+}$  complexes in **1** and **2**.

| Dy complex | CSM parameter |       |        |         | geometry |
|------------|---------------|-------|--------|---------|----------|
|            | PBPY-7        | COC-7 | CTPR-7 | JPBPY-7 |          |
| <b>1</b>   | 1.382         | 6.044 | 4.513  | 4.306   | PBPY-7   |
| <b>2</b>   | 1.470         | 5.483 | 4.219  | 4.192   | PBPY-7   |

\* CSM parameters:<sup>S1</sup>

CSM PBPY-7 = the parameter related to the pentagonal bipyramid geometry ( $D_{5h}$  symmetry)

CSM COC-7: = the parameter related to the capped octahedron geometry ( $C_{3v}$  symmetry)

CSM CTPR-7: = the parameter related to the capped trigonal prism geometry ( $C_{2v}$  symmetry)

CSM JPBPY-7: = the parameter related to the Johnson pentagonal bipyramid geometry (J13,  $D_{5h}$  symmetry)

CSM = 0 for the ideal geometry; the increase of CSM parameter is related to the increasing distortion from the ideal polyhedron.

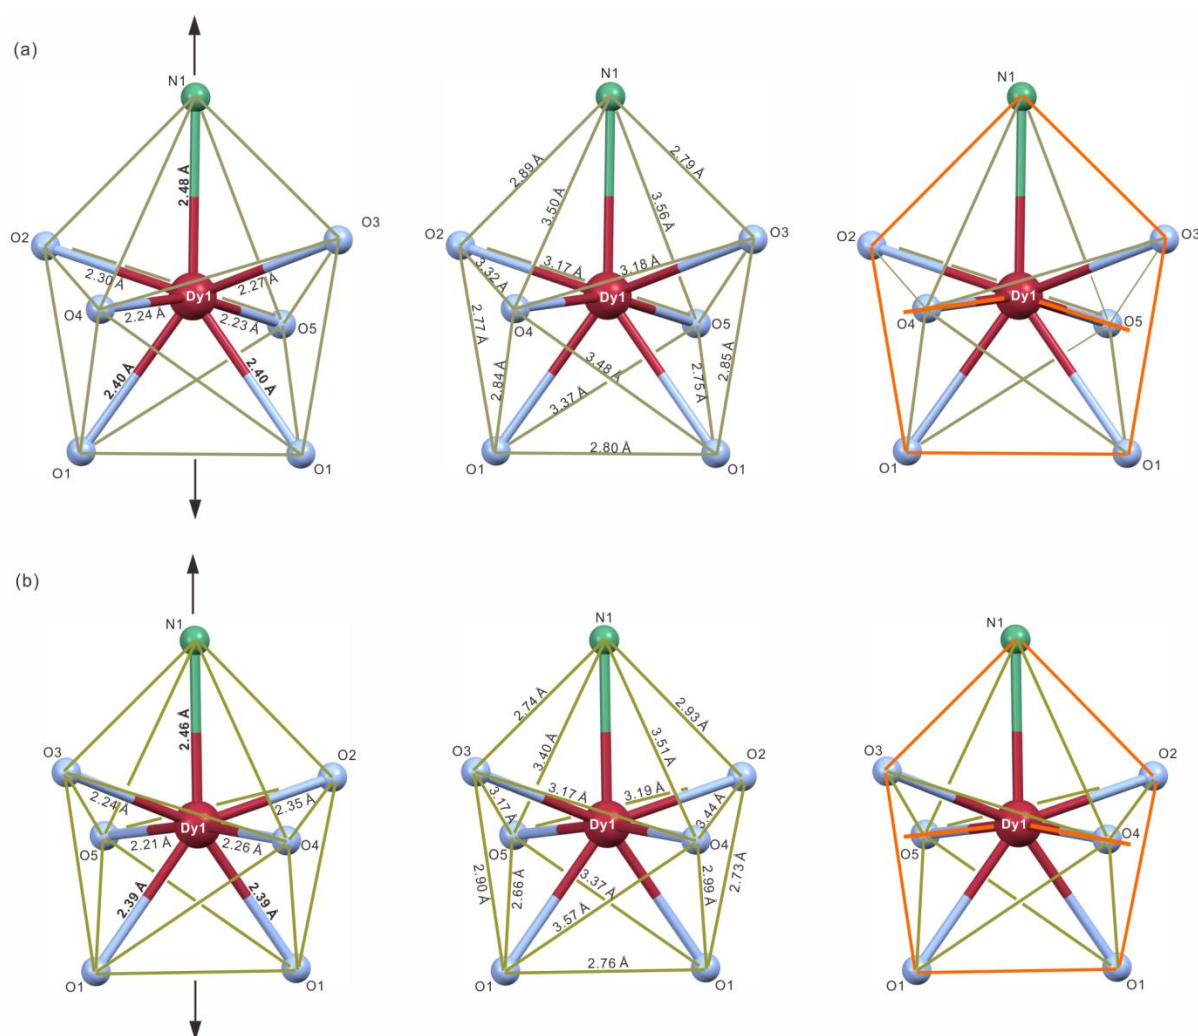

**Figure S5** Detailed insight into the geometry of  $[\text{Dy}^{\text{III}}(4\text{-pyridone})_4(\mu\text{-NC})(\text{H}_2\text{O})_2]^{2+}$  complexes in **1** (a), and **2** (b): the arrangement of bond lengths within the coordination polyhedron with the indicated elongation directions (black arrows, left), the detailed dimensions of the polyhedron of the distorted PBPY-7 geometry (middle), and the visualization of the PBPY-8 coordination polyhedron (right).

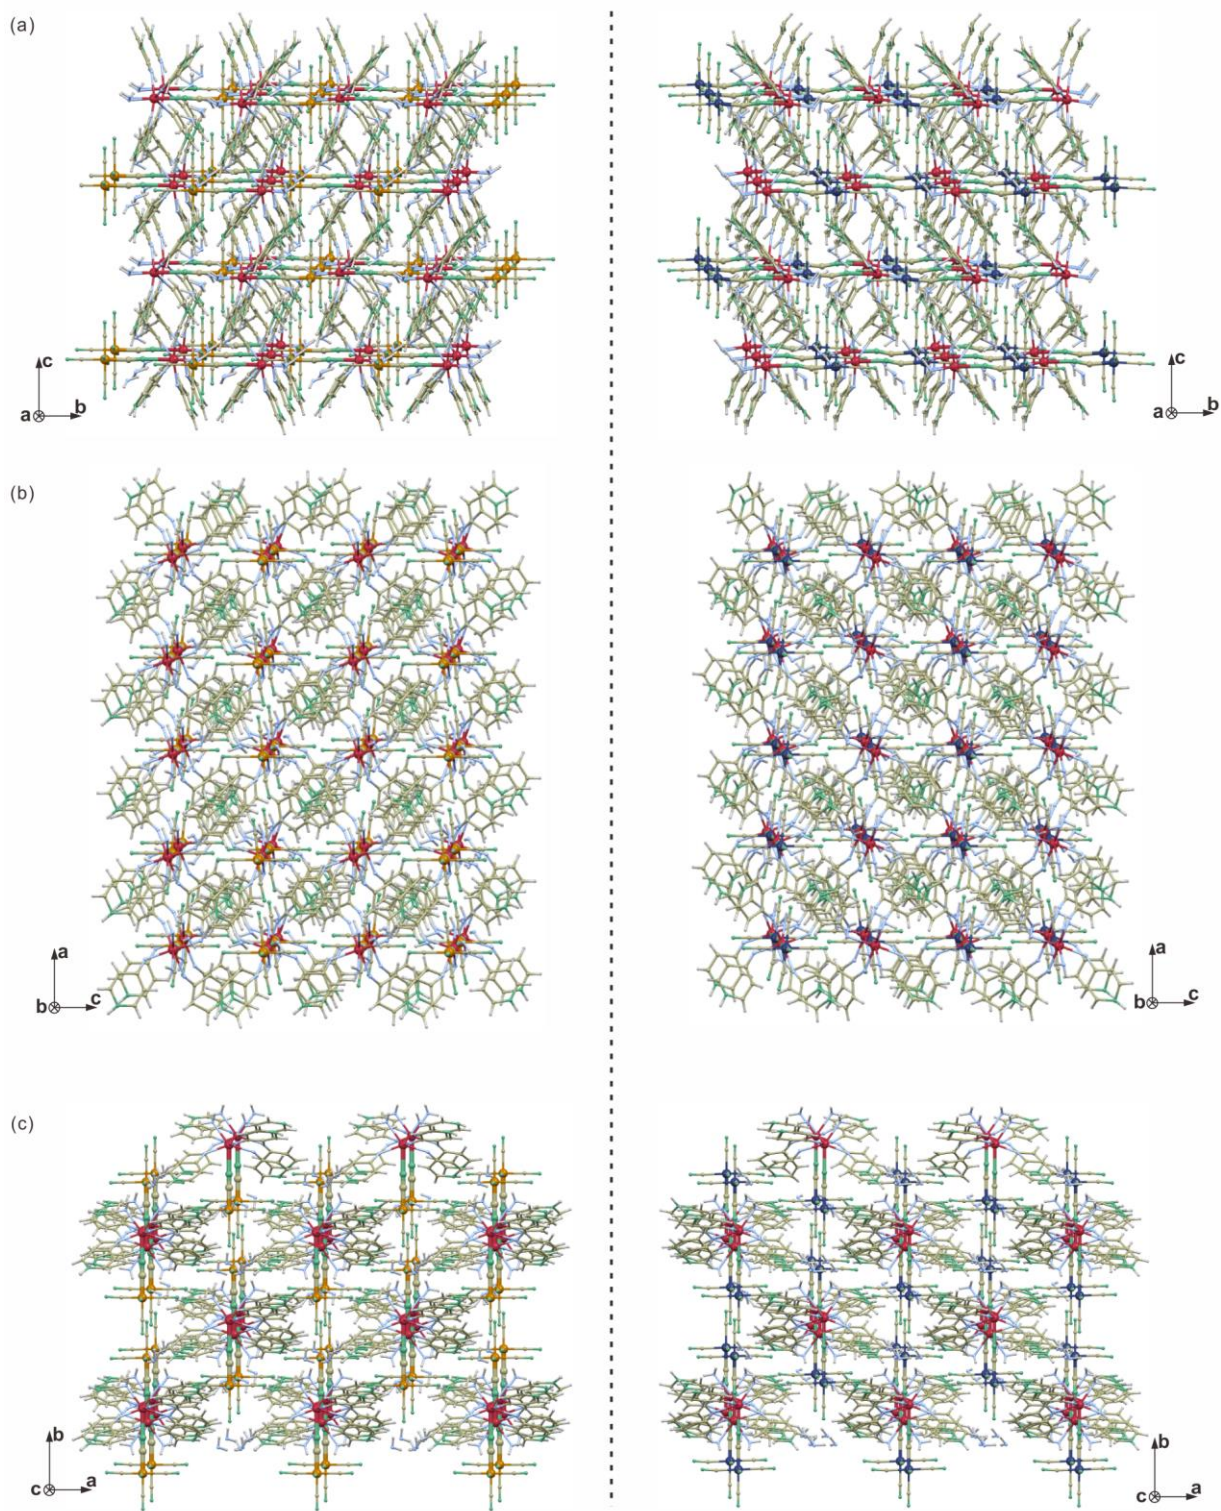

**Figure S6** The spatial arrangement of dinuclear molecules of **1** (left) and **2** (right) in the supramolecular network presented along the directions of *a* axis (*a*), *b* axis (*b*), and *c* axis (*c*). The selected alignments of 4-pyridone ligands coordinated to Dy<sup>III</sup> centers in **1** and **2** are the mirror images of each other. Colours: Dy, red; Co, brown; Rh, deep blue; C, dark yellow; N, green; O, light blue; H, light grey.

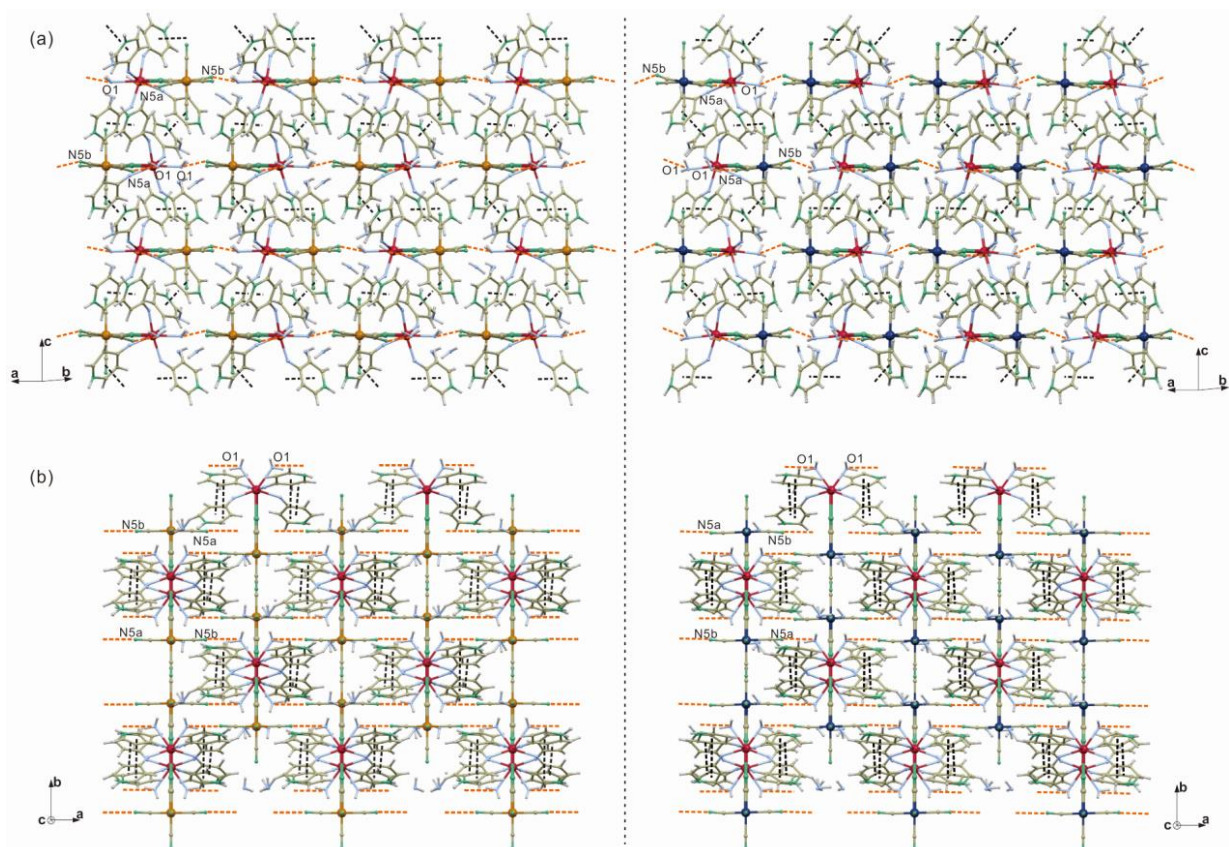

**Figure S7** The noncovalent interactions between dinuclear molecules in the supramolecular networks of **1** (left) and **2** (right) including the hydrogen bonding between water molecules and cyanides ( $\text{OH}\cdots\text{NC}$ , orange dashed lines), and  $\pi$ - $\pi$  interactions between the 4-pyridone rings (black dashed lines), in the view within the (110) plane (a) and the (001) plane (b). Distances between centers involved in hydrogen bonds: **1**, O1-N5a, 2.94 Å; O1-N5b, 3.04 Å; **2**, O1-N5a, 2.92 Å; O1-N5b, 3.00 Å. Average distances between centers of 4-pyridone rings: **1**, 3.5 Å; **2**, 3.5 Å. Colours: Dy, red; Co, brown; Rh, deep blue; C, dark yellow; N, green; O, light blue; H, light grey.

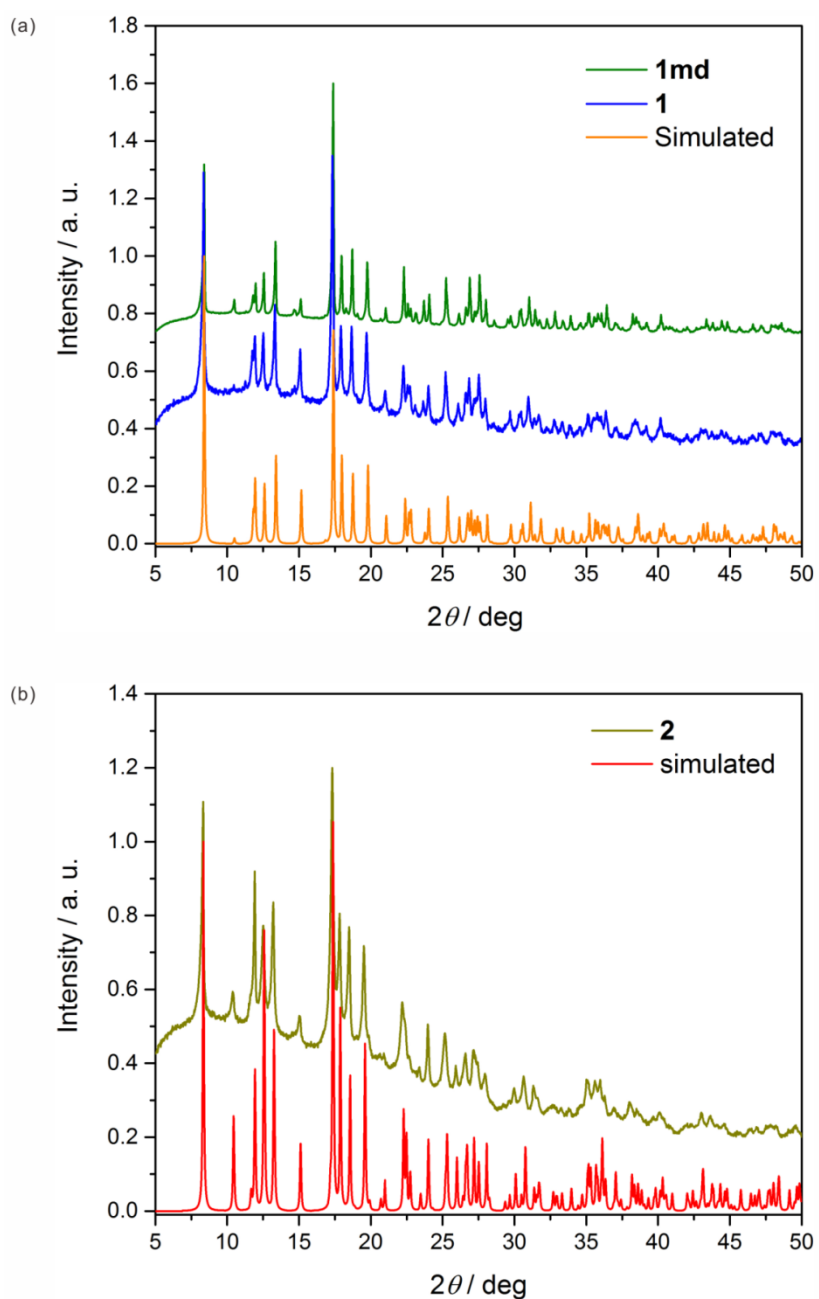

**Figure S8** The experimental powder X-ray diffraction patterns of **1** (a, blue line), and its magnetically diluted sample, **1md** (a, green line) compared with the simulated pattern based on the single-crystal XRD structural model of **1** (a, orange line), and the experimental powder X-ray diffraction pattern of **2** (b, dark yellow line) compared with the simulated pattern based on the single-crystal XRD model of **2** (b, red line).

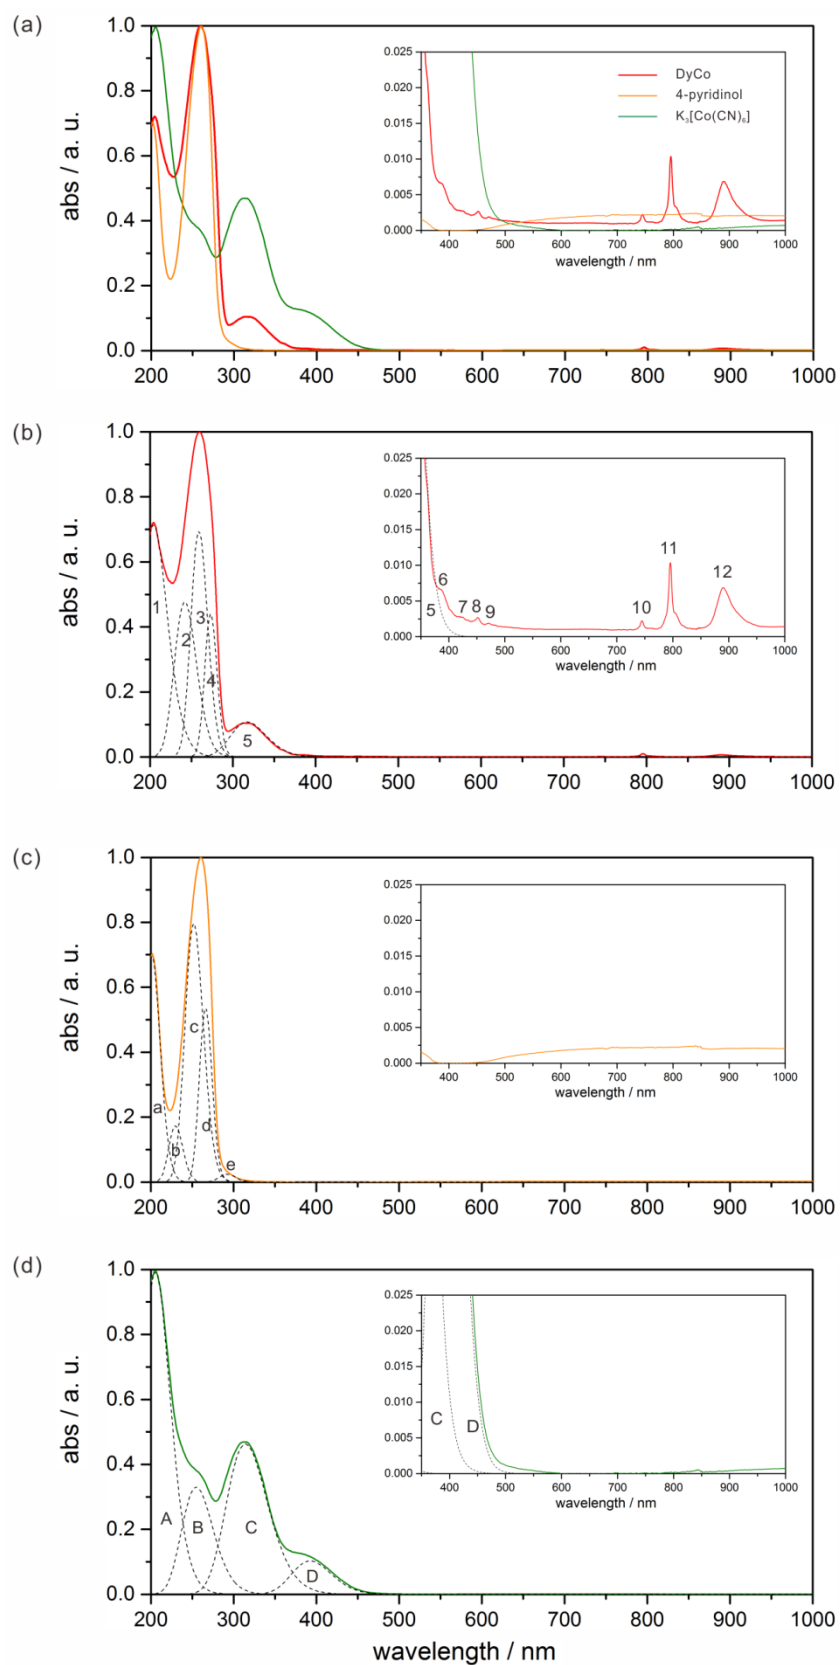

**Figure S9** Solid state UV-vis-NIR absorption spectra of **1** (a-b, red line) compared with the spectra of 4-pyridone (a, c, orange line), and  $K_3[Co^{III}(CN)_6]$  (a, d, green line). The experimental data were shown as the solid lines, while the deconvoluted components are illustrated as black dashed lines (see Table S5).

**Table S5** Analysis of solid state UV-vis-NIR absorption spectrum of **1** compared with the analyses of the related spectra of the references, that are 4-pyridone and  $K_3[Co^{III}(CN)_6]$  (see Figure S8).

| compound        | peak no. | $\lambda_{max}$ [nm] | $E_{max}$ [ $cm^{-1}$ ] | interpretation                                                                                                                                                                   |
|-----------------|----------|----------------------|-------------------------|----------------------------------------------------------------------------------------------------------------------------------------------------------------------------------|
| <b>1</b>        | 1        | 204                  | 40920                   | combined contribution from M→L charge transfer of $[Co^{III}(CN)_6]$ : $t_{2g} \rightarrow t_{1u}\pi^*$ and singlet to singlet transition of 4-pyridone: $\pi \rightarrow \pi^*$ |
|                 | 2        | 242                  | 41320                   | combined contribution from d-d of $Co^{III-LS}$ : $A_{1g} \rightarrow {}^1T_{2g}$ and singlet to singlet transition of 4-pyridone: $\pi \rightarrow \pi^*$                       |
|                 | 3        | 259                  | 38610                   | singlet to singlet transition of 4-pyridone: $\pi \rightarrow \pi^*$                                                                                                             |
|                 | 4        | 273                  | 36630                   | combined contribution from d-d of $Co^{III-LS}$ : $A_{1g} \rightarrow {}^1T_{1g}$ and singlet to singlet transition of 4-pyridone: $\pi \rightarrow \pi^*$                       |
|                 | 5        | 317                  | 31550                   | combined contribution from d-d of $Co^{III-LS}$ : $A_{1g} \rightarrow {}^3T_{1g}$ and singlet to triplet transition of 4-pyridone: $\pi \rightarrow \pi^*$                       |
|                 | 6        | 386                  | 25910                   | f-f of $Dy^{III}: S^2 {}^6H_{15/2} \rightarrow {}^4I_{13/2}$                                                                                                                     |
|                 | 7        | 425                  | 23530                   | f-f of $Dy^{III}: {}^6H_{15/2} \rightarrow {}^4G_{11/2}$                                                                                                                         |
|                 | 8        | 452                  | 22120                   | f-f of $Dy^{III}: {}^6H_{15/2} \rightarrow {}^4I_{15/2}$                                                                                                                         |
|                 | 9        | 471                  | 21230                   | f-f of $Dy^{III}: {}^6H_{15/2} \rightarrow {}^4F_{9/2}$                                                                                                                          |
|                 | 10       | 745                  | 13420                   | f-f of $Dy^{III}: {}^6H_{15/2} \rightarrow {}^6F_{3/2}$                                                                                                                          |
|                 | 11       | 795                  | 12580                   | f-f of $Dy^{III}: {}^6H_{15/2} \rightarrow {}^6F_{5/2}$                                                                                                                          |
|                 | 12       | 890                  | 11240                   | f-f of $Dy^{III}: {}^6H_{15/2} \rightarrow {}^6F_{7/2}$                                                                                                                          |
| 4-pyridone      | a        | 201                  | 49640                   | singlet to singlet transition: $S^3 \pi \rightarrow \pi^*$                                                                                                                       |
|                 | b        | 230                  | 43500                   |                                                                                                                                                                                  |
|                 | c        | 252                  | 39700                   |                                                                                                                                                                                  |
|                 | d        | 266                  | 37570                   |                                                                                                                                                                                  |
|                 | e        | 292                  | 34200                   | singlet to triplet transition: $\pi \rightarrow \pi^*$                                                                                                                           |
| $K_3[Co(CN)_6]$ | A        | 205                  | 48780                   | M→L charge transfer of $[Co^{III}(CN)_6]$ : $S^4 t_{2g} \rightarrow t_{1u}\pi^*$                                                                                                 |
|                 | B        | 255                  | 39200                   | d-d of $Co^{III-LS}$ : ${}^1A_{1g} \rightarrow {}^1T_{2g}$<br>(minor contribution of ${}^1A_{1g} \rightarrow {}^5T_{2g}$ )                                                       |
|                 | C        | 314                  | 31850                   | d-d of $Co^{III-LS}$ : ${}^1A_{1g} \rightarrow {}^1T_{1g}$<br>(minor contribution of ${}^1A_{1g} \rightarrow {}^3T_{2g}$ )                                                       |
|                 | D        | 393                  | 25450                   | d-d of $Co^{III-LS}$ : ${}^1A_{1g} \rightarrow {}^3T_{1g}$                                                                                                                       |

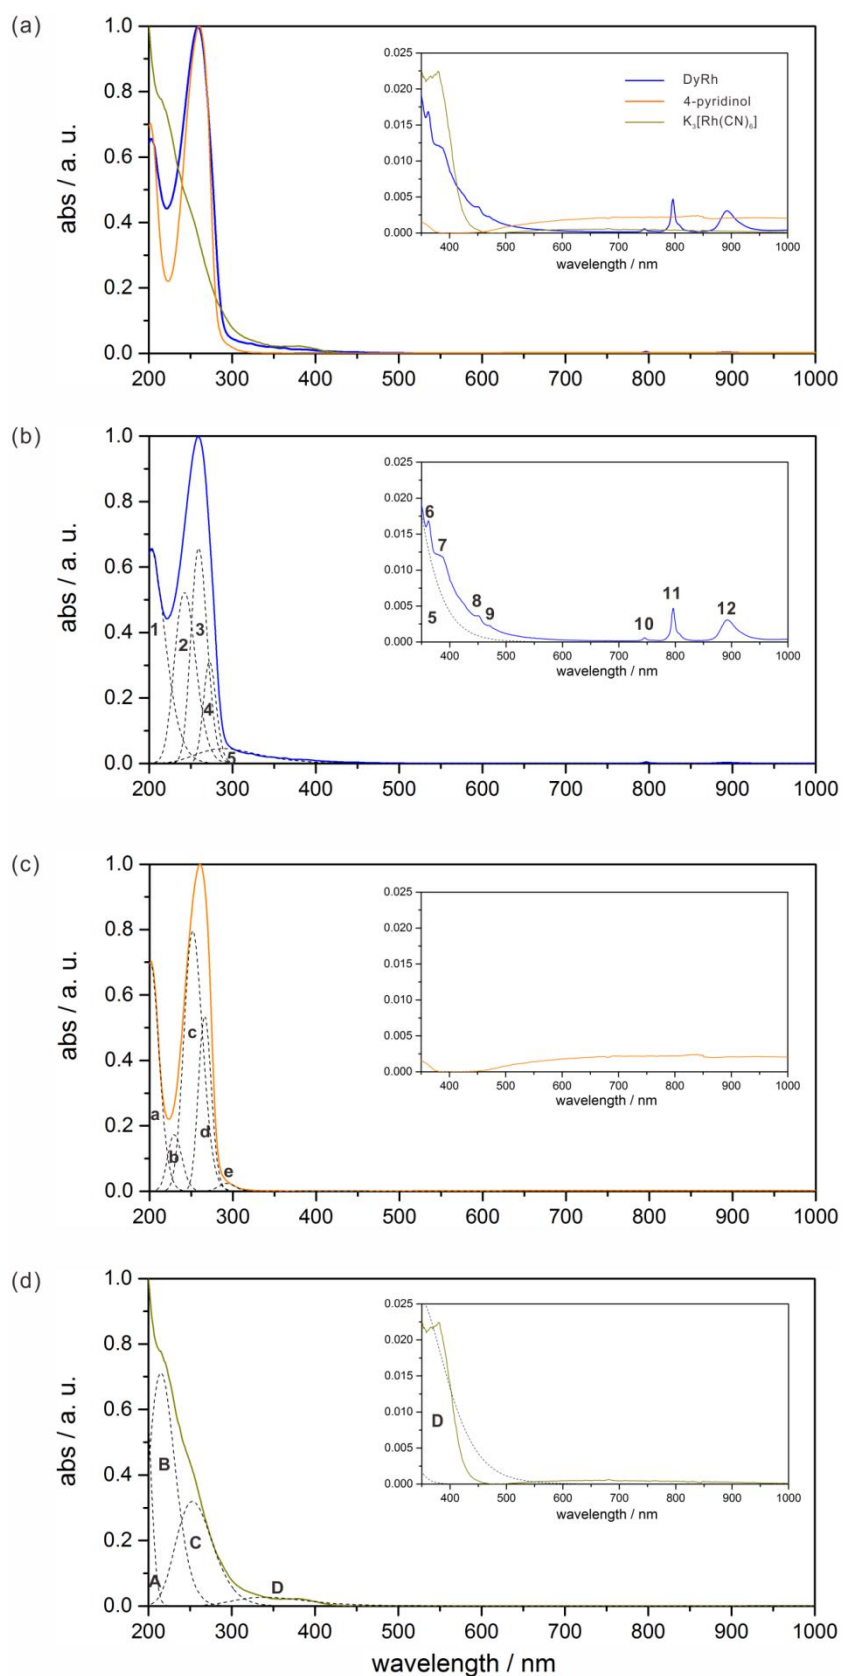

**Figure S10** Solid state UV-vis-NIR absorption spectra of **2** (*a-b*, blue line) compared with the spectra of 4-pyridone (*a, c*, orange line), and  $K_3[Rh^{III}(CN)_6]$  (*a, d*, dark yellow line). The experimental data were shown as the solid lines, while the deconvoluted components are illustrated as black dashed lines (see Table S6).



**Table S6** Analysis of solid state UV-vis-NIR absorption spectrum of **2** compared with the analyses of the related spectra of the references, that are 4-pyridone and  $K_3[Rh^{III}(CN)_6]$  (see Figure S9).

| compound        | peak no. | $\lambda_{max}$ [nm] | $E_{max}$ [ $cm^{-1}$ ] | interpretation                                                                                                                                                                   |
|-----------------|----------|----------------------|-------------------------|----------------------------------------------------------------------------------------------------------------------------------------------------------------------------------|
| <b>2</b>        | 1        | 202                  | 49500                   | combined contribution from M→L charge transfer of $[Rh^{III}(CN)_6]$ : $t_{2g} \rightarrow t_{1u}\pi^*$ and singlet to singlet transition of 4-pyridone: $\pi \rightarrow \pi^*$ |
|                 | 2        | 242                  | 41320                   | combined contribution from d-d of $Rh^{III-LS}$ : $A_{1g} \rightarrow {}^1T_{2g}$ and singlet to singlet transition of 4-pyridone: $\pi \rightarrow \pi^*$                       |
|                 | 3        | 259                  | 38610                   | singlet to singlet transition of 4-pyridone: $\pi \rightarrow \pi^*$                                                                                                             |
|                 | 4        | 272                  | 36630                   | combined contribution from d-d of $Rh^{III-LS}$ : $A_{1g} \rightarrow {}^1T_{1g}$ and singlet to singlet transition of 4-pyridone: $\pi \rightarrow \pi^*$                       |
|                 | 5        | 289                  | 34600                   | combined contribution from d-d of $Rh^{III-LS}$ : $A_{1g} \rightarrow {}^3T_{1g}$ and singlet to triplet transition of 4-pyridone: $\pi \rightarrow \pi^*$                       |
|                 | 6        | 362                  | 27620                   | f-f of $Dy^{III}$ : ${}^6H_{15/2} \rightarrow {}^4M_{19/2} + {}^4P_{5/2}$                                                                                                        |
|                 | 7        | 387                  | 25840                   | f-f of $Dy^{III}$ : ${}^6H_{15/2} \rightarrow {}^4I_{13/2}$                                                                                                                      |
|                 | 8        | 452                  | 22120                   | f-f of $Dy^{III}$ : ${}^6H_{15/2} \rightarrow {}^4I_{15/2}$                                                                                                                      |
|                 | 9        | 471                  | 21230                   | f-f of $Dy^{III}$ : ${}^6H_{15/2} \rightarrow {}^4F_{9/2}$                                                                                                                       |
|                 | 10       | 745                  | 13420                   | f-f of $Dy^{III}$ : ${}^6H_{15/2} \rightarrow {}^6F_{3/2}$                                                                                                                       |
|                 | 11       | 797                  | 12550                   | f-f of $Dy^{III}$ : ${}^6H_{15/2} \rightarrow {}^6F_{5/2}$                                                                                                                       |
|                 | 12       | 892                  | 11210                   | f-f of $Dy^{III}$ : ${}^6H_{15/2} \rightarrow {}^6F_{7/2}$                                                                                                                       |
| 4-pyridone      | a        | 201                  | 49640                   | singlet to singlet transition: ${}^S_3 \pi \rightarrow \pi^*$                                                                                                                    |
|                 | b        | 230                  | 43500                   |                                                                                                                                                                                  |
|                 | c        | 252                  | 39700                   |                                                                                                                                                                                  |
|                 | d        | 266                  | 37570                   |                                                                                                                                                                                  |
|                 | e        | 292                  | 34200                   | singlet to triplet transition: $\pi \rightarrow \pi^*$                                                                                                                           |
| $K_3[Rh(CN)_6]$ | A        | 197                  | 50780                   | M→L charge transfer: ${}^S_4 t_{2g} \rightarrow t_{1u}\pi^*$                                                                                                                     |
|                 | B        | 215                  | 46500                   | d-d of $Rh^{III-LS}$ : ${}^1A_{1g} \rightarrow {}^1T_{2g}$<br>(minor contribution of ${}^1A_{1g} \rightarrow {}^5T_{2g}$ )                                                       |
|                 | C        | 253                  | 39500                   | d-d of $Rh^{III-LS}$ : ${}^1A_{1g} \rightarrow {}^1T_{1g}$<br>(minor contribution of ${}^1A_{1g} \rightarrow {}^3T_{2g}$ )                                                       |
|                 | D        | 340                  | 29400                   | d-d of $Rh^{III-LS}$ : ${}^1A_{1g} \rightarrow {}^3T_{1g}$                                                                                                                       |

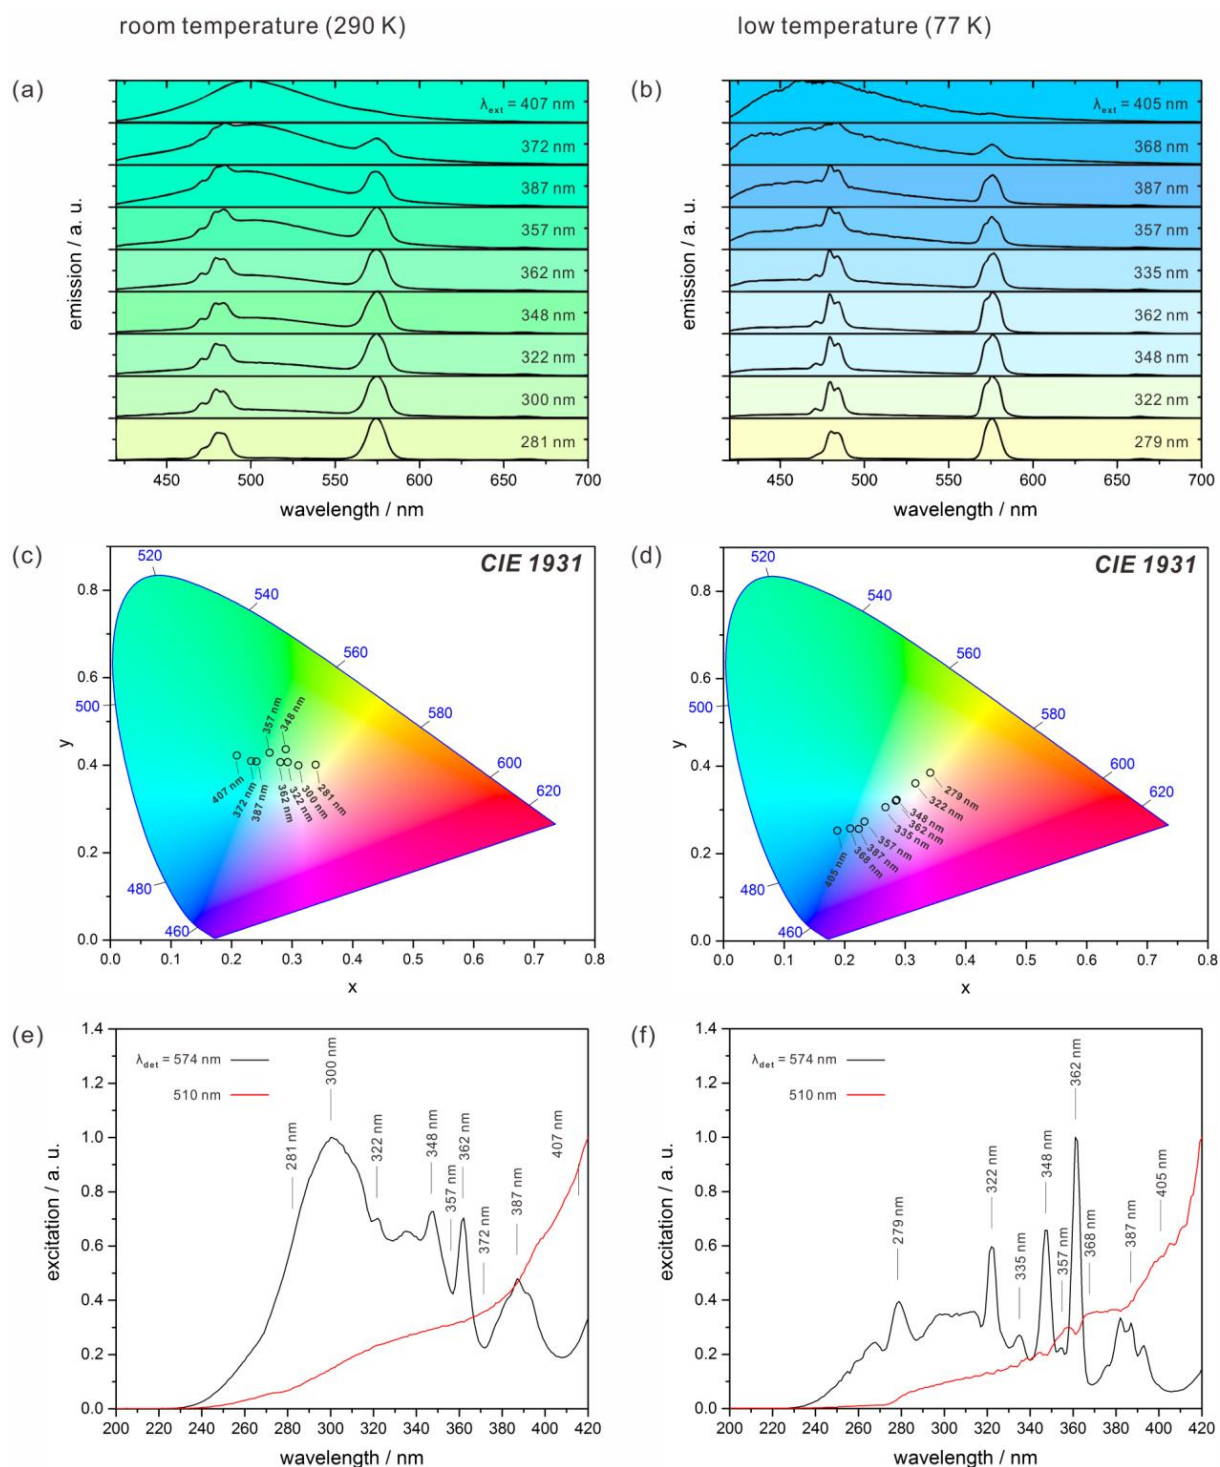

**Figure S11** Solid state UV-vis emission spectra of **1** excited by various indicated UV wavelengths (*a*, *b*), together with the resulting emission colours illustrated on the CIE 1931 chromaticity diagrams (*c*, *d*), and the related excitation spectra by the monitoring the pure emission peaks of Dy<sup>III</sup> ( $\lambda_{\text{em}} = 574$  nm, black line), and 4-pyridone ( $\lambda_{\text{em}} = 510$  nm, red line), respectively (*e*, *f*), at room temperature (290 K, left panel: *a*, *c*, *e*) and low temperature (77 K, right panel: *b*, *d*, *f*).

**Table S7** Summary of  $xy$  parameters of the CIE 1931 chromaticity scale for the emission colours of **1** under various excitation with indicated wavelengths at room temperature and low temperature (see Figure S10).

| $T$                            | $\lambda_{\text{exc}} / \text{nm}$ | $x$   | $y$   |
|--------------------------------|------------------------------------|-------|-------|
| room<br>temperature<br>(290 K) | 281                                | 0.339 | 0.401 |
|                                | 300                                | 0.311 | 0.399 |
|                                | 322                                | 0.293 | 0.407 |
|                                | 348                                | 0.290 | 0.436 |
|                                | 362                                | 0.281 | 0.407 |
|                                | 357                                | 0.263 | 0.429 |
|                                | 387                                | 0.241 | 0.408 |
|                                | 372                                | 0.232 | 0.409 |
|                                | 407                                | 0.209 | 0.422 |
| low<br>temperature<br>(77 K)   | 279                                | 0.341 | 0.385 |
|                                | 322                                | 0.317 | 0.360 |
|                                | 348                                | 0.286 | 0.323 |
|                                | 362                                | 0.285 | 0.321 |
|                                | 335                                | 0.268 | 0.306 |
|                                | 387                                | 0.224 | 0.256 |
|                                | 357                                | 0.233 | 0.273 |
|                                | 368                                | 0.209 | 0.257 |
|                                | 405                                | 0.188 | 0.252 |

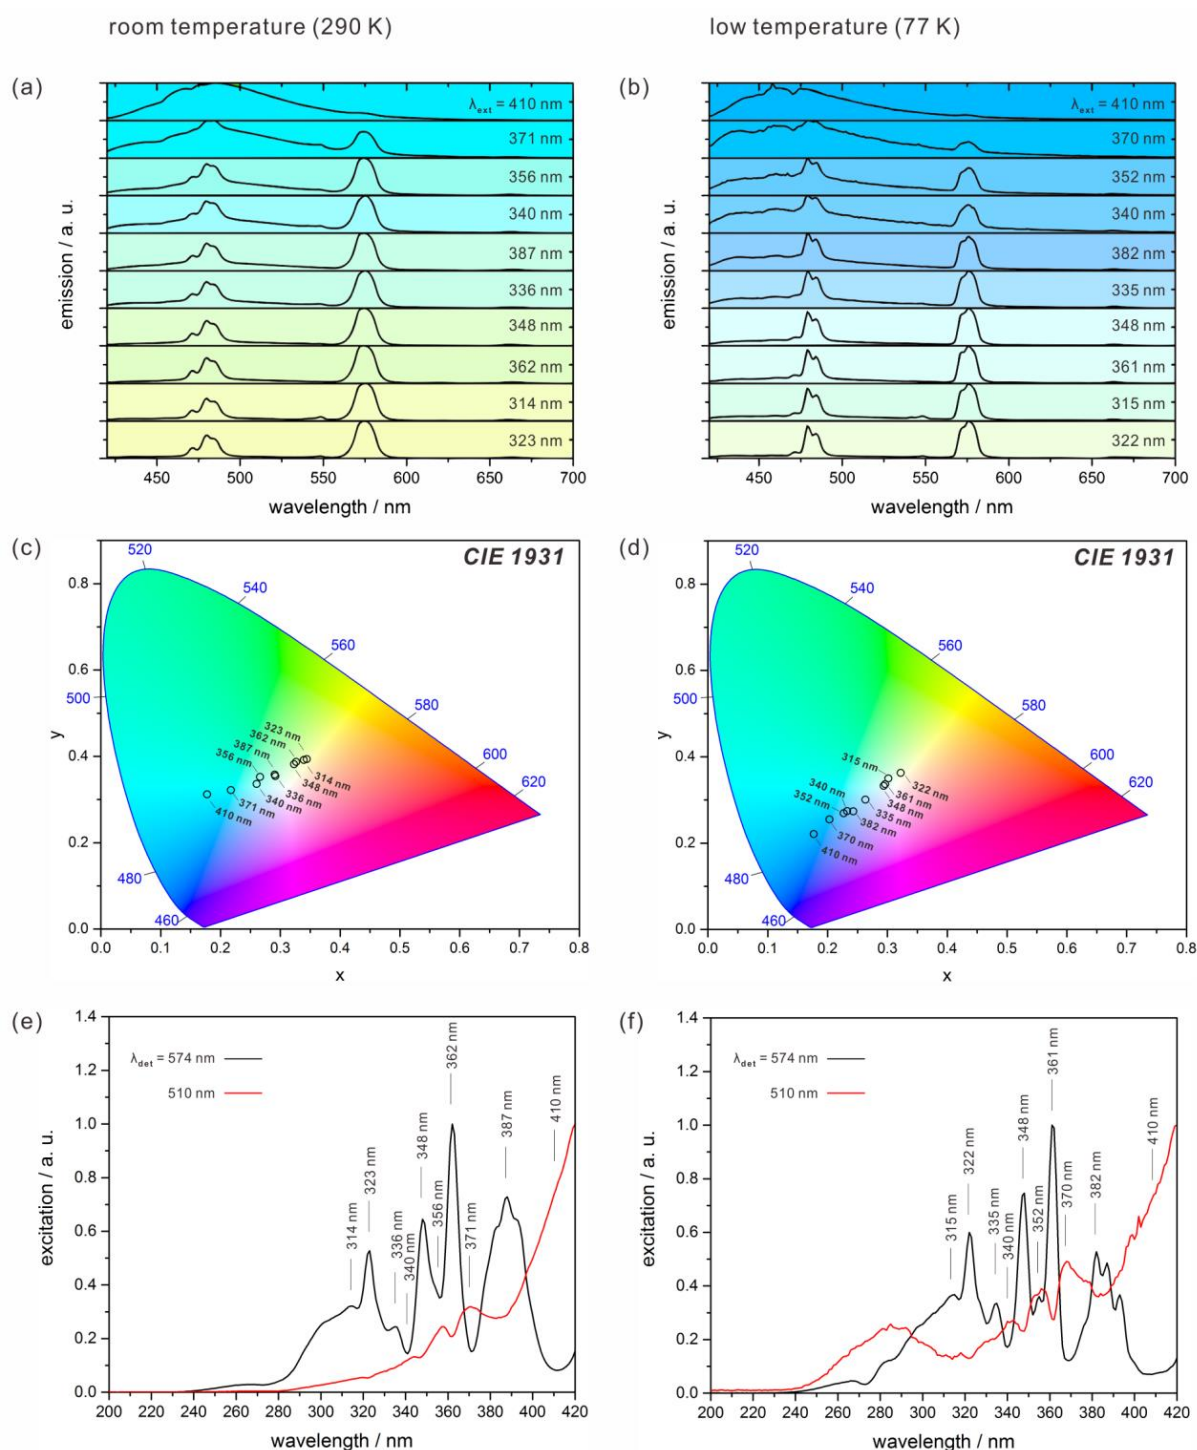

**Figure S12** Solid state UV-vis emission spectra of **2** excited by various indicated UV wavelengths (*a*, *b*), together with the resulting emission colours illustrated on the CIE 1931 chromaticity diagrams (*c*, *d*), and the related excitation spectra by the monitoring the pure emission peaks of  $\text{Dy}^{\text{III}}$  ( $\lambda_{em} = 574$  nm, black line), and 4-pyridone ( $\lambda_{em} = 510$  nm, red line), respectively (*e*, *f*), at room temperature (290 K, left panel: *a*, *c*, *e*) and low temperature (77 K, right panel: *b*, *d*, *f*).

**Table S8** Summary of  $xy$  parameters of the CIE 1931 chromaticity scale for the emission colours of **2** under various excitation with indicated wavelengths at room temperature and low temperature (see Figure S11).

| $T$                      | $\lambda_{\text{exc}} / \text{nm}$ | $x$   | $y$   |
|--------------------------|------------------------------------|-------|-------|
| room temperature (290 K) | 323                                | 0.344 | 0.393 |
|                          | 314                                | 0.339 | 0.392 |
|                          | 362                                | 0.327 | 0.387 |
|                          | 348                                | 0.323 | 0.382 |
|                          | 336                                | 0.292 | 0.354 |
|                          | 387                                | 0.291 | 0.358 |
|                          | 340                                | 0.260 | 0.336 |
|                          | 356                                | 0.266 | 0.352 |
|                          | 371                                | 0.217 | 0.322 |
|                          | 410                                | 0.178 | 0.312 |
| low temperature (77 K)   | 322                                | 0.322 | 0.363 |
|                          | 315                                | 0.302 | 0.350 |
|                          | 361                                | 0.296 | 0.337 |
|                          | 348                                | 0.294 | 0.333 |
|                          | 335                                | 0.263 | 0.300 |
|                          | 382                                | 0.243 | 0.274 |
|                          | 340                                | 0.233 | 0.274 |
|                          | 352                                | 0.227 | 0.269 |
|                          | 370                                | 0.203 | 0.255 |
|                          | 410                                | 0.177 | 0.221 |

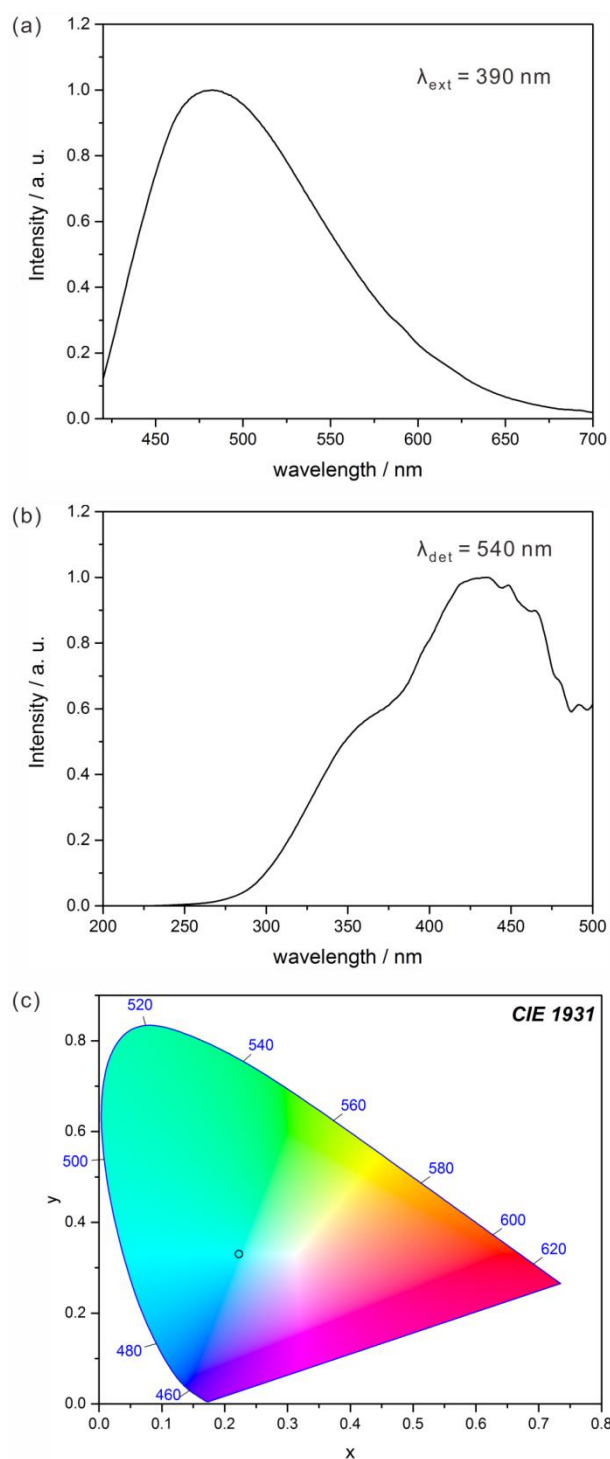

**Figure S13** Solid state UV-vis emission spectrum of  $K_3[Rh(CN)_6]$  under the excitation light of 390 nm (a), the excitation spectrum of  $K_3[Rh(CN)_6]$  by the monitored emission at 540 nm (b), and the estimated emission colour shown on the CIE 1931 chromaticity diagram (c), with  $xy$  parameters of  $x = 0.223$ ,  $y = 0.330$ . The measurement was performed at room temperature.

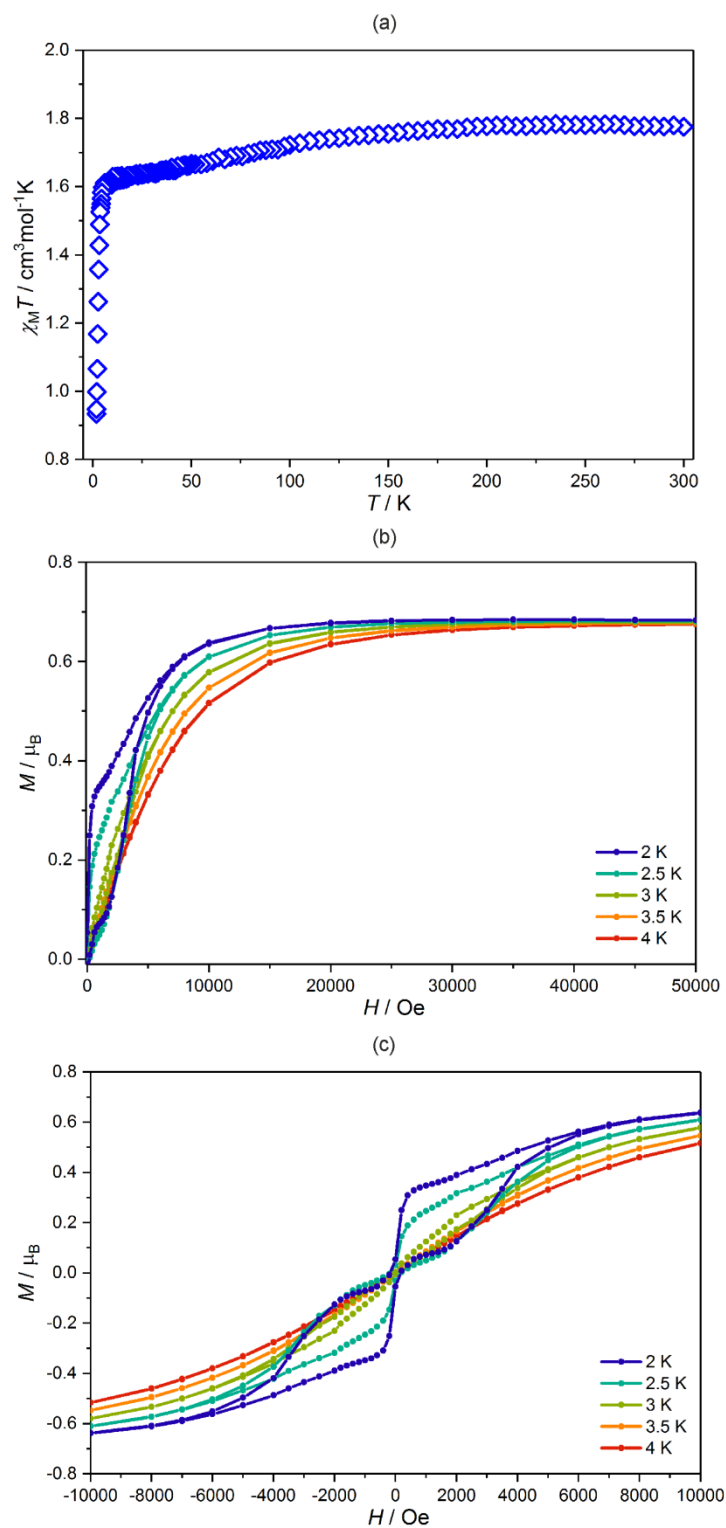

**Figure S14** Direct-current (*dc*) magnetic properties of the magnetically diluted sample of **1**, called **1md** (see the comment below): temperature dependence of  $\chi_M T$  at  $H_{dc} = 1000$  Oe (a), field dependence of molar magnetization,  $M$ , at indicated temperatures of 2–4 K (b), and the butterfly-shaped hysteresis loops of the  $M(H)$  plots at indicated temperatures (c).

## Comment to Figure S14

### Synthesis and basic characterization of **1md**

In order to investigate deeply the magnetic property of Dy<sup>III</sup> complexes, the magnetically diluted sample of **1** with diamagnetic yttrium(III), named **1md**, was prepared. Two precursor solutions were prepared as follows. The 0.024 mmol (9 mg) portion of DyCl<sub>3</sub>·6H<sub>2</sub>O, the 0.21 mmol (65 mg) portion of YCl<sub>3</sub>, and the 2.4 mmol (230 mg) portion of 4-pyridone were dissolved together in the 1.0 ml of distilled water to get solution I, and the 0.24 mmol (80 mg) portion of K<sub>3</sub>[Co(CN)<sub>6</sub>] was dissolved in the 1.0 ml of distilled water to get solution II. Solution I was heated with stirring, and it was poured into solution II after reaching a boiling point. The resulting solution was filtrated using a vacuum pump after quick stirring for a few seconds, then the vial with the filtrate was left closed for crystallization. After several hours, colourless transparent block-shaped crystals of **1md** were grown in the solution. After one day, the polycrystalline product was collected by a suction filtration, washed by a small portion of water and ethanol, and dried overnight under an air atmosphere, to give 132 mg of the product (yield: 58 %), with the chemical formula of [(Dy<sup>III</sup><sub>0.12</sub>Y<sup>III</sup><sub>0.88</sub>)(4-pyridone)<sub>4</sub>(H<sub>2</sub>O)<sub>2</sub>][Co<sup>III</sup>(CN)<sub>6</sub>]·2H<sub>2</sub>O (*M*<sub>w</sub> = 765 g·mol<sup>-1</sup>). The composition of **1md**, analogous to that found for **1**, was precisely investigated by the CHN elemental analysis of the standard microanalytical method, and thermogravimetric studies. The metal analysis executed by means of inductively couple plasma mass spectrometry (ICP-MS) technique indicated that **1md** contains 12% of Dy<sup>III</sup>, and 88% of Y<sup>III</sup>, in terms of the f-metal composition. In addition, the powder X-ray diffraction studies revealed the identical PXRD patterns for both the polycrystalline samples of **1** and **1md**, as well as the pattern simulated from the single-crystal X-ray diffraction model of **1**, which proved that **1** and **1md** are isostructural (Figure S7). Therefore, **1md** can be treated as the magnetically diluted sample of **1**. CHN elemental analysis. Anal. Calcd. for Dy<sub>0.12</sub>Y<sub>0.88</sub>Co<sub>1</sub>C<sub>26</sub>H<sub>28</sub>N<sub>10</sub>O<sub>8</sub> (*M*<sub>w</sub> = 765.3 g·mol<sup>-1</sup>): C, 40.8 %; H, 3.7 %; N, 18.3 %. Found: C, 40.6 %; H, 3.8 %; N, 18.3 %. TGA: loss of 4 H<sub>2</sub>O (two crystallization and two coordinated water molecules), calcd. 9.4 %, found 9.2 % (Figure S2).



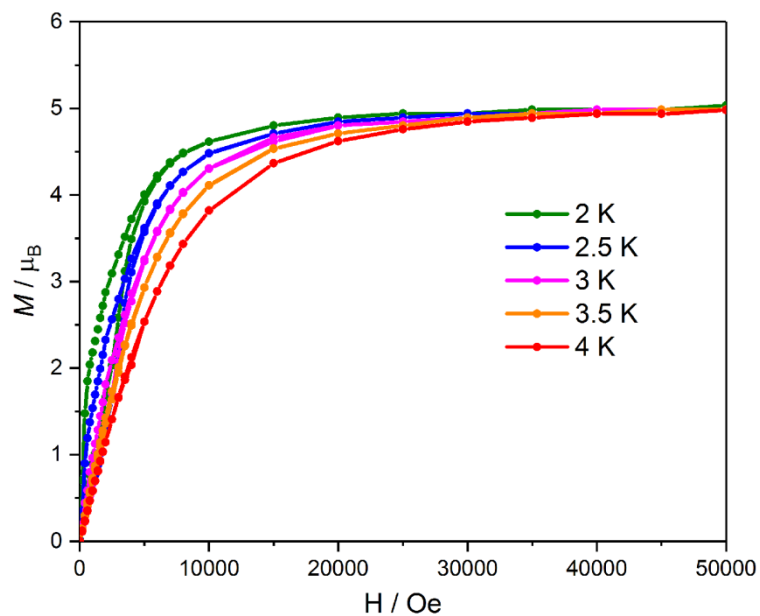

**Figure S15** Field dependence of molar magnetization of **1**,  $M$ , at the indicated temperatures from the 2–4 K range.

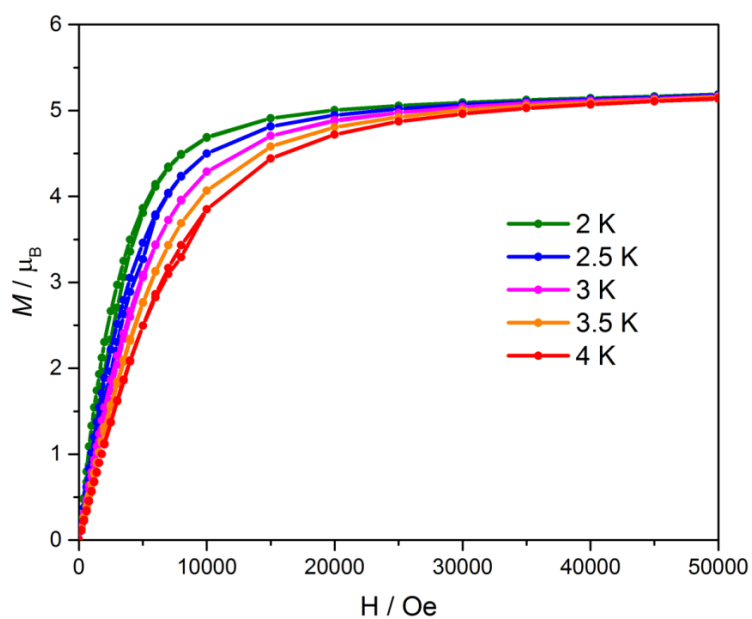

**Figure S16** Field dependence of molar magnetization of **2**,  $M$ , at the indicated temperatures from the 2–4 K range.

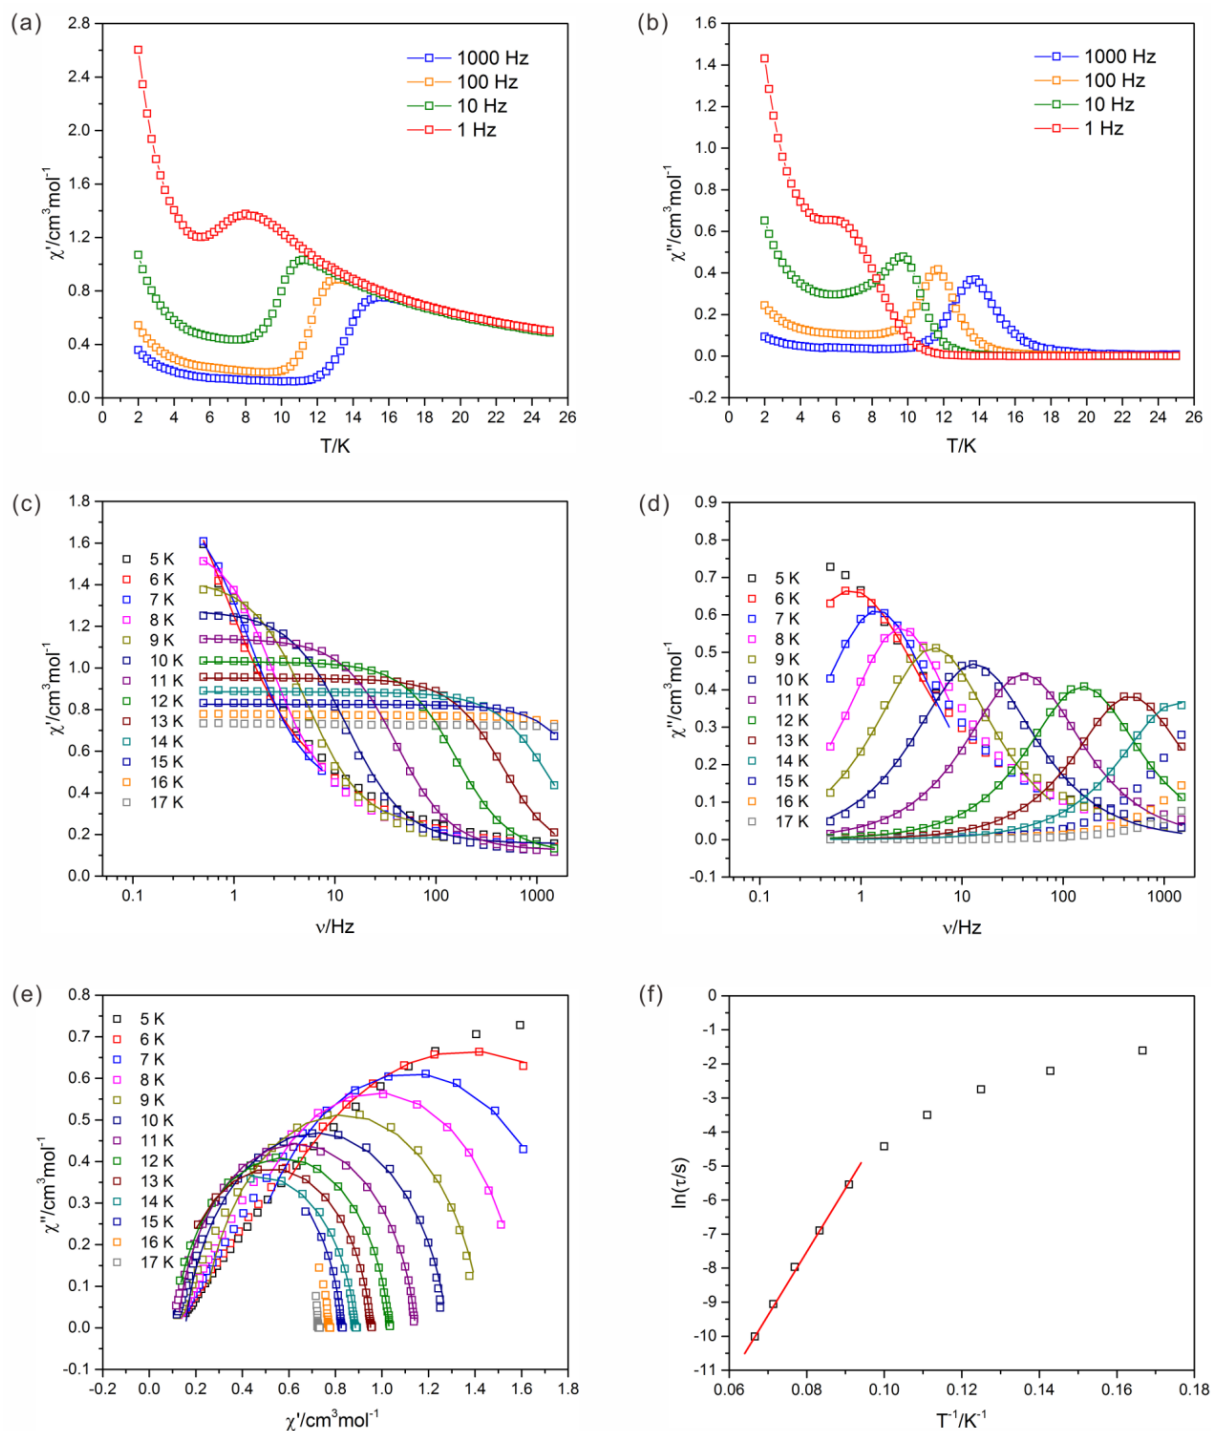

**Figure S17** Full *ac* magnetic characteristics of **1** under zero *dc* field with  $H_{ac} = 3$  Oe: temperature dependences of the in-plane,  $\chi_M'$  (a) and out-of-plane,  $\chi_M''$  (b) components of the complex magnetic susceptibility under indicated frequencies of the 1-1000 Hz range, frequency dependences of the  $\chi_M'$  (c), and  $\chi_M''$  (d) at indicated temperatures ranging from 5 to 17 K, the related Cole-Cole plots (e), the temperature dependence of the relaxation time plotted as  $\ln(\tau)$  versus  $T^{-1}$  (f). Solid lines in (c-e) are fitted curves by using the generalized Debye model (Table S9), while the solid line in (f) is the fitting following the Arrhenius law ( $\ln \tau = \ln \tau_0 - (\Delta E/k_B \cdot T^{-1})$ ), giving the effective energy barrier,  $U_{eff} = \Delta E/k_B = 187(6)$  K, with the pre-exponential factor,  $\tau_0 = 1.9(8) \times 10^{-10}$  s.

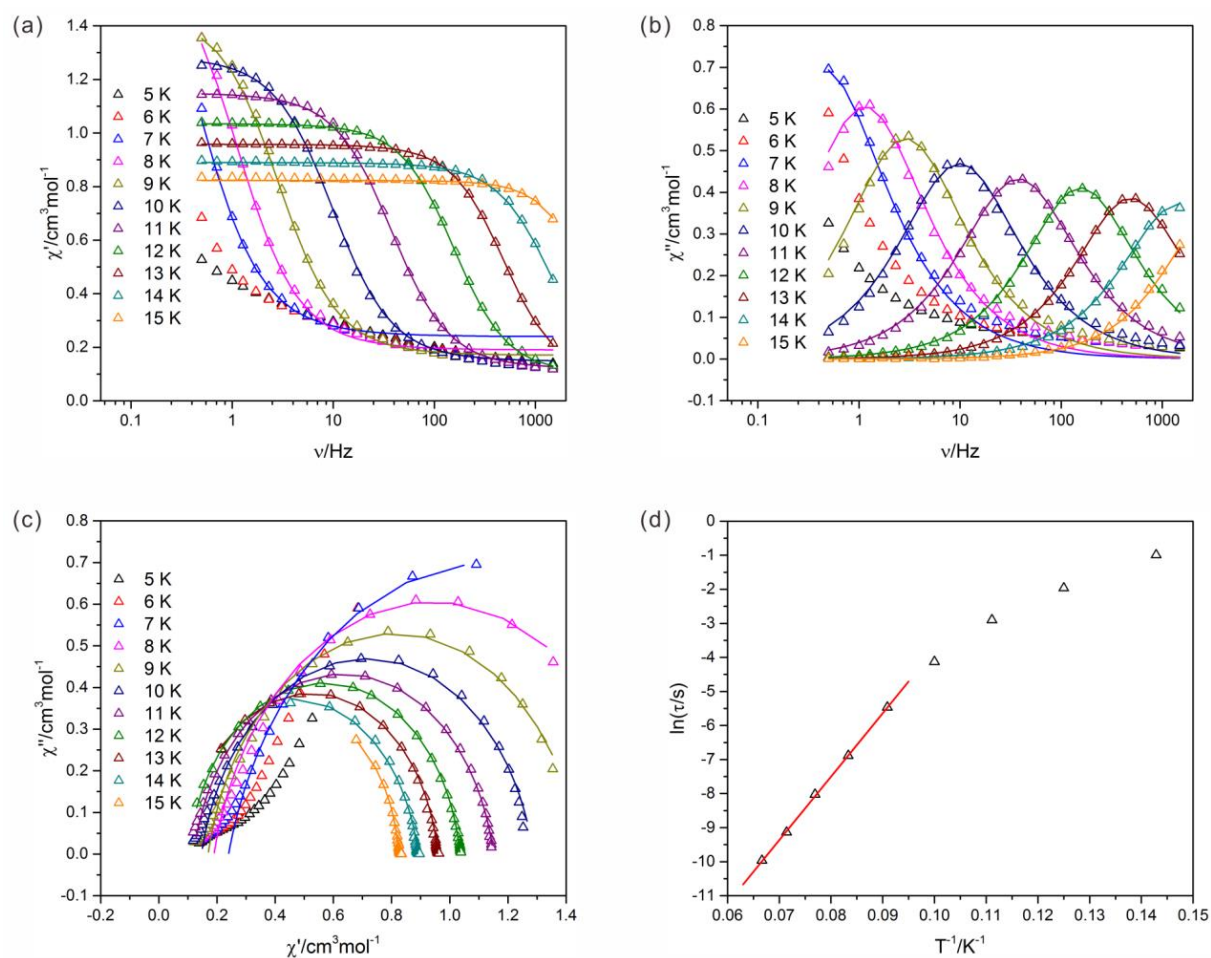

**Figure S18** Full *ac* magnetic characteristics of **1** under  $H_{dc} = 1000$  Oe field with  $H_{ac} = 3$  Oe: temperature dependences of the in-plane,  $\chi_M'$  (a) and out-of-plane,  $\chi_M''$  (b) components of the complex magnetic susceptibility under indicated frequencies of the 1-1000 Hz range, frequency dependences of the  $\chi_M'$  (c), and  $\chi_M''$  (d) at indicated temperatures ranging from 5 to 17 K, the related Cole-Cole plots (e), the temperature dependence of the relaxation time plotted as  $\ln(\tau)$  versus  $T^{-1}$  (f). Solid lines in (c-e) are fitted curves by using the generalized Debye model (Table S9), while the solid line in (f) is the fitting following the Arrhenius law ( $\ln \tau = \ln \tau_0 - (\Delta E/k_B \cdot T^{-1})$ ), giving the effective energy barrier,  $U_{\text{eff}} = \Delta E/k_B = 186(2)$  K, with the pre-exponential factor,  $\tau_0 = 1.9(3) \times 10^{-10}$  s.

**Table S9** Fitting parameters of **1** using generalized Debye model for *ac* magnetic data under zero *dc* field (see Figure 16), and under  $H_{dc} = 1000$  Oe (see Figure 17).<sup>S5</sup>

| magnetic <i>dc</i> field | <i>T</i> / K | $\chi_S / \text{cm}^3\text{mol}^{-1}$ | $\chi_T / \text{cm}^3\text{mol}^{-1}$ | $\tau / \text{s}$ | $\alpha$ |
|--------------------------|--------------|---------------------------------------|---------------------------------------|-------------------|----------|
| 0 Oe                     | 6            | 0.350                                 | 2.390                                 | 0.20              | 0.264    |
|                          | 7            | 0.380                                 | 1.860                                 | 0.110             | 0.120    |
|                          | 8            | 0.350                                 | 1.60                                  | 0.0640            | 0.0630   |
|                          | 9            | 0.230                                 | 1.430                                 | 0.030             | 0.10     |
|                          | 10           | 0.155                                 | 1.280                                 | 0.0120            | 0.115    |
|                          | 11           | 0.123                                 | 1.143                                 | 0.00390           | 0.090    |
|                          | 12           | 0.110                                 | 0.103                                 | 0.00101           | 0.0750   |
|                          | 13           | 0.0950                                | 0.951                                 | 0.000345          | 0.070    |
|                          | 14           | 0.0460                                | 0.886                                 | 0.000117          | 0.0870   |
|                          | 15           | 0.010                                 | 0.830                                 | 0.0000450         | 0.0630   |
| 1000 Oe                  | 7            | 0.240                                 | 2.04                                  | 0.370             | 0.160    |
|                          | 8            | 0.190                                 | 1.69                                  | 0.140             | 0.135    |
|                          | 9            | 0.170                                 | 1.45                                  | 0.0550            | 0.120    |
|                          | 10           | 0.147                                 | 1.287                                 | 0.0161            | 0.123    |
|                          | 11           | 0.120                                 | 1.15                                  | 0.00422           | 0.110    |
|                          | 12           | 0.102                                 | 1.035                                 | 0.00102           | 0.080    |
|                          | 13           | 0.0880                                | 0.958                                 | 0.000327          | 0.075    |
|                          | 14           | 0.0199                                | 0.890                                 | 0.000108          | 0.096    |
|                          | 15           | 0.0730                                | 0.823                                 | 0.0000470         | 0.040    |

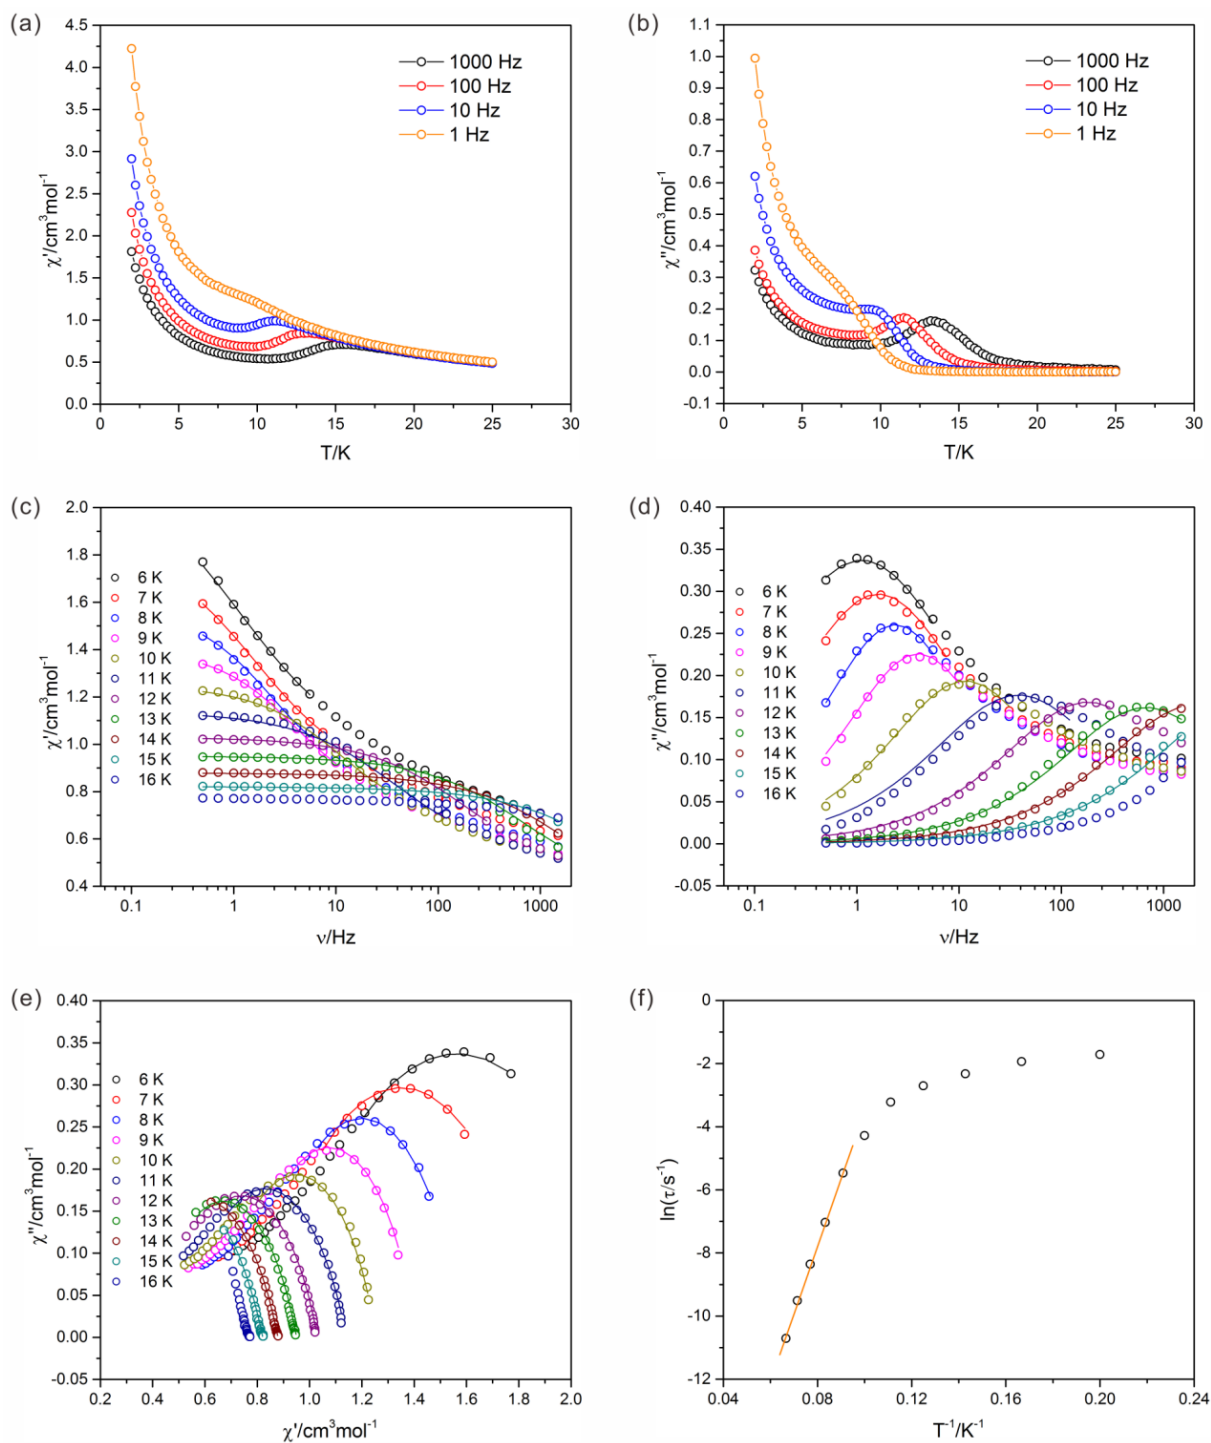

**Figure S19** Full  $ac$  magnetic characteristics of **2** under zero  $dc$  field with  $H_{ac} = 3$  Oe: temperature dependences of the in-plane,  $\chi_M'$  (a) and out-of-plane,  $\chi_M''$  (b) components of the complex magnetic susceptibility under indicated frequencies of the 1-1000 Hz range, frequency dependences of the  $\chi_M'$  (c), and  $\chi_M''$  (d) at indicated temperatures ranging from 5 to 18 K, the related Cole-Cole plots (e), the temperature dependence of the relaxation time plotted as  $\ln(\tau)$  versus  $T^{-1}$  (f). Solid lines in (c-e) are fitted curves by using the generalized Debye model (Table S10), while the solid line in (f) is the fitting following the Arrhenius law ( $\ln \tau = \ln \tau_0 - (\Delta E/k_B \cdot T^{-1})$ ), giving the effective energy barrier,  $U_{\text{eff}} = \Delta E/k_B = 214(4)$  K, with the pre-exponential factor,  $\tau_0 = 1.7(5) \times 10^{-11}$  s.

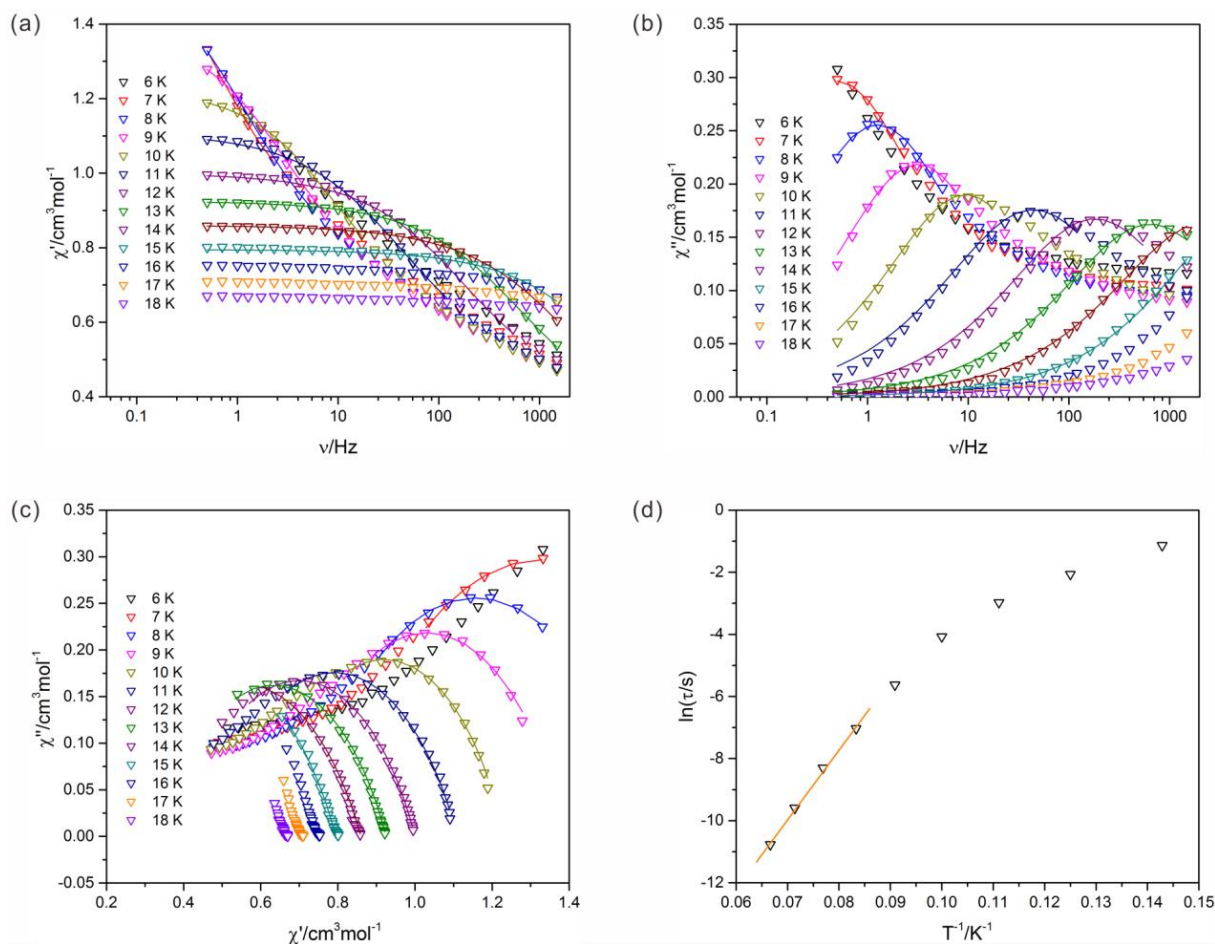

**Figure S20** Full *ac* magnetic characteristics of **2** under  $H_{dc} = 1000$  Oe field with  $H_{ac} = 3$  Oe: temperature dependences of the in-plane,  $\chi_M'$  (a) and out-of-plane,  $\chi_M''$  (b) components of the complex magnetic susceptibility under indicated frequencies of the 1-1000 Hz range, frequency dependences of the  $\chi_M'$  (c), and  $\chi_M''$  (d) at indicated temperatures ranging from 5 to 18 K, the related Cole-Cole plots (e), the temperature dependence of the relaxation time plotted as  $\ln(\tau)$  versus  $T^{-1}$  (f). Solid lines in (c-e) are fitted curves by using the generalized Debye model (Table S10), while the solid line in (f) is the fitting following the Arrhenius law ( $\ln\tau = \ln\tau_0 - (\Delta E/k_B \cdot T^{-1})$ ), giving the effective energy barrier,  $U_{eff} = \Delta E/k_B = 224(8)$  K, with the pre-exponential factor,  $\tau_0 = 7(5) \times 10^{-12}$  s.

**Table S10** Fitting parameters of **2** using generalized Debye model for *ac* magnetic data under zero *dc* field (see Figure 18), and under  $H_{dc} = 1000$  Oe (see Figure 19).<sup>S5</sup>

| magnetic <i>dc</i> field | <i>T</i> / K | $\chi_S / \text{cm}^3\text{mol}^{-1}$ | $\chi_T / \text{cm}^3\text{mol}^{-1}$ | $\tau / \text{s}$ | $\alpha$ |
|--------------------------|--------------|---------------------------------------|---------------------------------------|-------------------|----------|
| 0 Oe                     | 6            | 0.87                                  | 2.26                                  | 0.144             | 0.425    |
|                          | 7            | 0.81                                  | 1.89                                  | 0.098             | 0.36     |
|                          | 8            | 0.81                                  | 1.59                                  | 0.067             | 0.25     |
|                          | 9            | 0.741                                 | 1.406                                 | 0.04              | 0.24     |
|                          | 10           | 0.643                                 | 1.253                                 | 0.0138            | 0.28     |
|                          | 11           | 0.52                                  | 1.14                                  | 0.0042            | 0.34     |
|                          | 12           | 0.45                                  | 1.03                                  | 0.00088           | 0.33     |
|                          | 13           | 0.39                                  | 0.95                                  | 0.000235          | 0.332    |
|                          | 14           | 0.279                                 | 0.879                                 | 0.000074          | 0.355    |
|                          | 15           | 0.181                                 | 0.821                                 | 0.0000224         | 0.37     |
| 1000 Oe                  | 7            | 0.78                                  | 1.88                                  | 0.32              | 0.37     |
|                          | 8            | 0.705                                 | 1.61                                  | 0.127             | 0.345    |
|                          | 9            | 0.67                                  | 1.39                                  | 0.051             | 0.305    |
|                          | 10           | 0.61                                  | 1.23                                  | 0.017             | 0.3      |
|                          | 11           | 0.47                                  | 1.11                                  | 0.0036            | 0.36     |
|                          | 12           | 0.4                                   | 1                                     | 0.000881          | 0.352    |
|                          | 13           | 0.34                                  | 0.925                                 | 0.000248          | 0.355    |
|                          | 14           | 0.24                                  | 0.86                                  | 0.000068          | 0.379    |
|                          | 15           | 0.14                                  | 0.795                                 | 0.000021          | 0.365    |

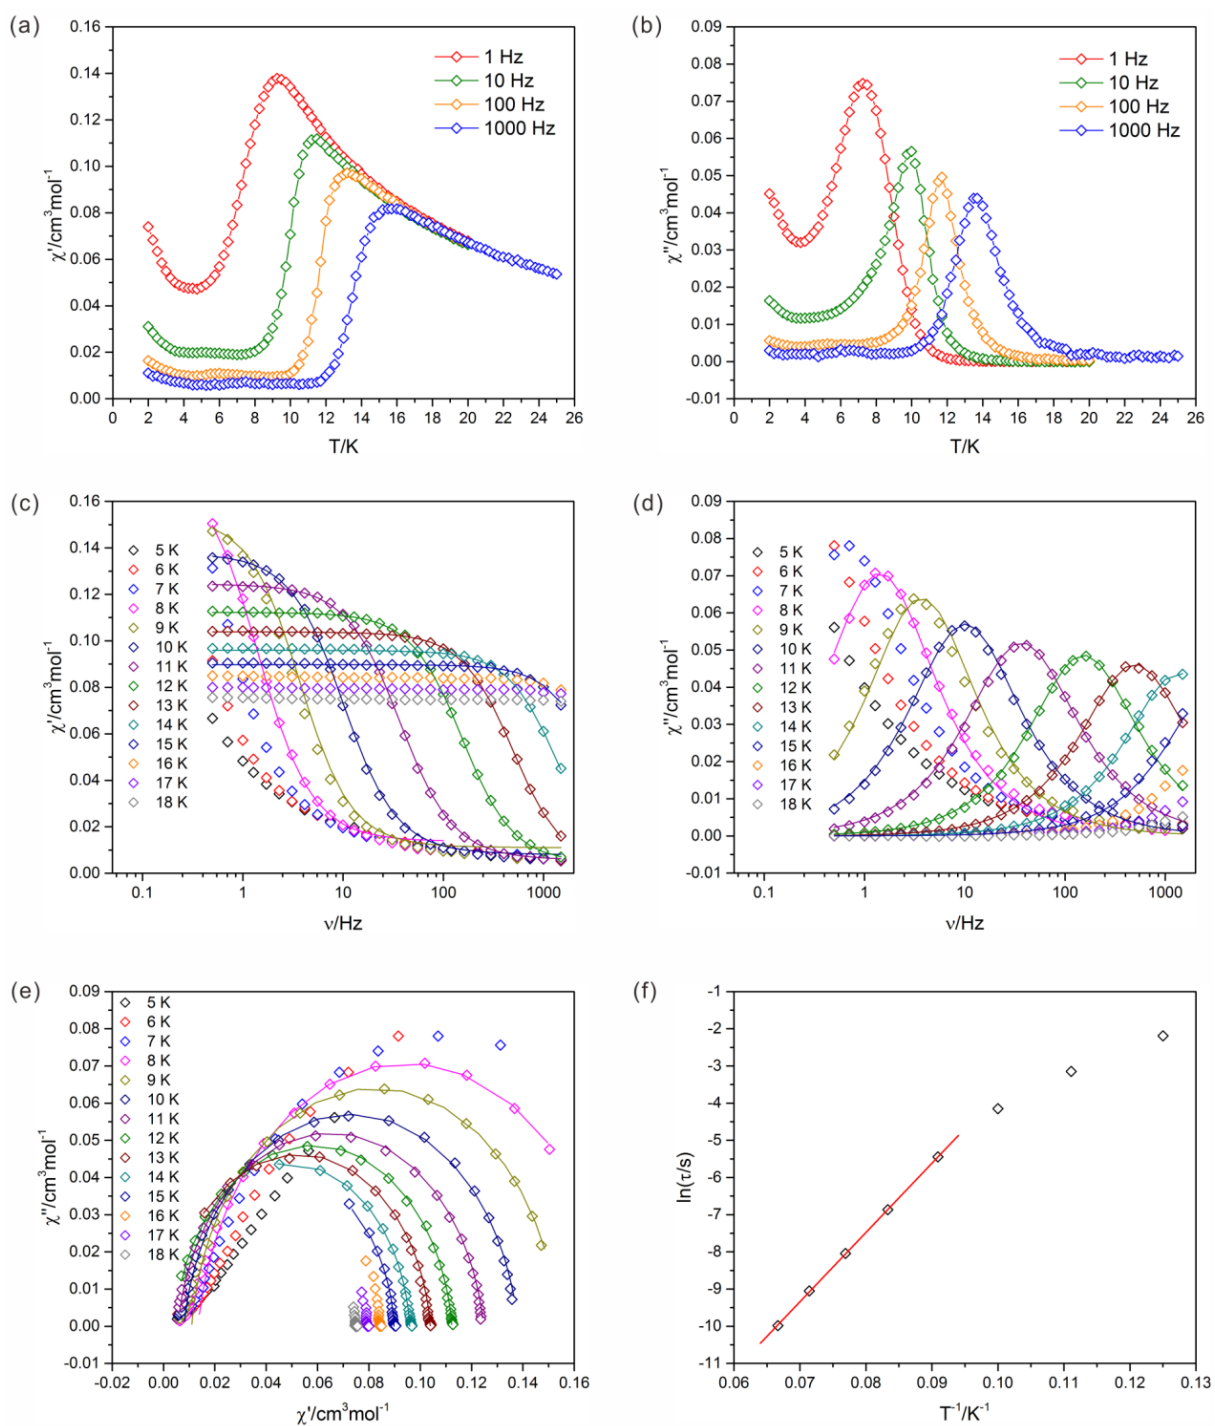

**Figure S21** Full *ac* magnetic characteristics of **1md** under zero *dc* field with  $H_{ac} = 3$  Oe: temperature dependences of the in-plane,  $\chi_M'$  (a) and out-of-plane,  $\chi_M''$  (b) components of the complex magnetic susceptibility under indicated frequencies of the 1-1000 Hz range, frequency dependences of the  $\chi_M'$  (c), and  $\chi_M''$  (d) at indicated temperatures ranging from 5 to 18 K, the related Cole-Cole plots (e), the temperature dependence of the relaxation time plotted as  $\ln(\tau)$  versus  $T^{-1}$  (f). Solid lines in (c-e) are fitted curves by using the generalized Debye model (Table S10), while the solid line in (f) is the fitting following the Arrhenius law ( $\ln \tau = \ln \tau_0 - (\Delta E/k_B \cdot T^{-1})$ ), giving the effective energy barrier,  $U_{eff} = \Delta E/k_B = 186(1)$  K, with the pre-exponential factor,  $\tau_0 = 1.89(17) \times 10^{-10}$  s.



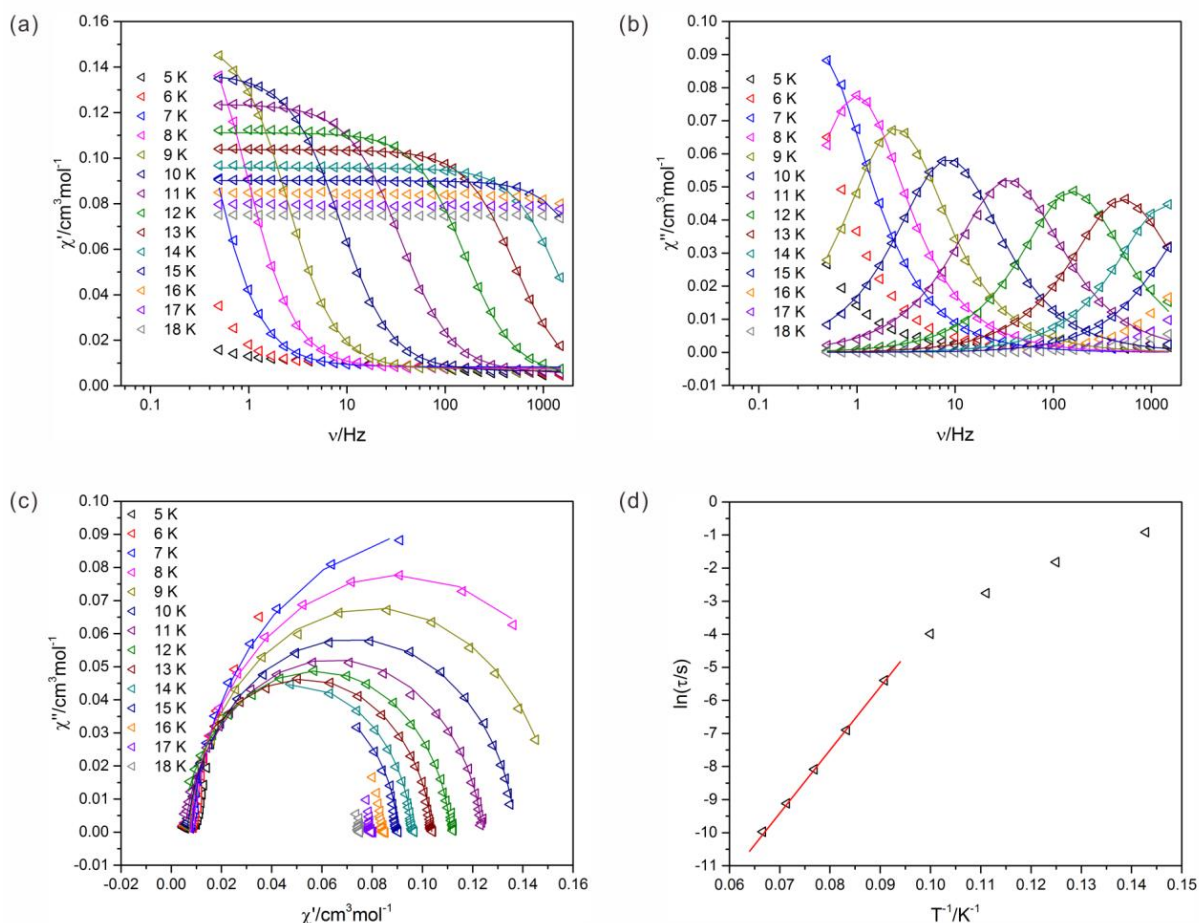

**Figure S22** Full *ac* magnetic characteristics of **1md** under  $H_{dc} = 1000$  Oe with  $H_{ac} = 3$  Oe: temperature dependences of the in-plane,  $\chi_M'$  (a) and out-of-plane,  $\chi_M''$  (b) components of the complex magnetic susceptibility under indicated frequencies of the 1-1000 Hz range, frequency dependences of the  $\chi_M'$  (c), and  $\chi_M''$  (d) at indicated temperatures ranging from 5 to 18 K, the related Cole-Cole plots (e), the temperature dependence of the relaxation time plotted as  $\ln(\tau)$  versus  $T^{-1}$  (f). Solid lines in (c-e) are fitted curves by using the generalized Debye model (Table S10), while the solid line in (f) is the fitting following the Arrhenius law ( $\ln\tau = \ln\tau_0 - (\Delta E/k_B \cdot T^{-1})$ ), giving the effective energy barrier,  $U_{\text{eff}} = \Delta E/k_B = 191(2)$  K, with the pre-exponential factor,  $\tau_0 = 1.25(14) \times 10^{-10}$  s.

**Table S10** Fitting parameters of **1md** using generalized Debye model for *ac* magnetic data under zero *dc* field (see Figure 20), and under  $H_{dc} = 1000$  Oe (see Figure 21).<sup>S5</sup>

| magnetic <i>dc</i> field | <i>T</i> / K | $\chi_S / \text{cm}^3\text{mol}^{-1}$ | $\chi_T / \text{cm}^3\text{mol}^{-1}$ | $\tau / \text{s}$ | $\alpha$ |
|--------------------------|--------------|---------------------------------------|---------------------------------------|-------------------|----------|
| 0 Oe                     | 8            | 0.0135                                | 0.1755                                | 0.112             | 0.086    |
|                          | 9            | 0.011                                 | 0.154                                 | 0.043             | 0.07     |
|                          | 10           | 0.008                                 | 0.138                                 | 0.01582           | 0.0833   |
|                          | 11           | 0.0056                                | 0.1246                                | 0.00431           | 0.085    |
|                          | 12           | 0.0043                                | 0.1123                                | 0.00104           | 0.066    |
|                          | 13           | 0.0015                                | 0.1039                                | 0.0003205         | 0.065    |
|                          | 14           | 0.0009                                | 0.0959                                | 0.000117          | 0.051    |
|                          | 15           | 0.0008                                | 0.0898                                | 0.000046          | 0.046    |
| 1000 Oe                  | 7            | 0.0083                                | 0.2043                                | 0.4               | 0.05     |
|                          | 8            | 0.0078                                | 0.1738                                | 0.162             | 0.042    |
|                          | 9            | 0.0072                                | 0.1532                                | 0.0633            | 0.047    |
|                          | 10           | 0.0063                                | 0.1373                                | 0.01853           | 0.072    |
|                          | 11           | 0.00535                               | 0.12385                               | 0.00454           | 0.08     |
|                          | 12           | 0.0042                                | 0.1112                                | 0.00101           | 0.06     |
|                          | 13           | 0.00175                               | 0.10375                               | 0.000308          | 0.062    |
|                          | 14           | 0.0002                                | 0.0957                                | 0.00011           | 0.043    |
|                          | 15           | 0.0015                                | 0.0901                                | 0.0000466         | 0.035    |

## References to Supporting Information

- [S1] (a) M. Llunell, D. Casanova, J. Cirera, J. Bofill, P. Alemany, S. Alvarez, M. Pinsky and D. Avnir, *SHAPE v. 2.1. Program for the Calculation of Continuous Shape Measures of Polygonal and Polyhedral Molecular Fragments*, University of Barcelona: Barcelona, Spain, 2013; (b) D. Casanova, J. Cirera, M. Llunell, P. Alemany, D. Avnir and S. Alvarez, *J. Am. Chem. Soc.* 2004, **126**, 1755.
- [S2] (a) J. Feng, H.-J. Zhang, S.-Y. Song, Z.-F. Li, L.-N. Sun, Y. Xing and X.-M. Guo, *J. Lumin.* 2008, **128**, 1957; (b) J. Feng, L. Zhou, S.-Y. Song, Z.-F. Li, W.-Q. Fan, L.-N. Sun, Y.-N. Yu and H.-J. Zhang, *Dalton Trans.* 2009, 6593; (c) G. Kaur and S. B. Rai, *J. Fluoresc.* 2012, **22**, 475; (d) E. Pavitra, G. Seeta Rama Raju, W. Park and J. Su Yu, *New J. Chem.* 2014, **38**, 163; (e) D. D. Ramteke and R. S. Gedam, *Spectr. Lett.* 2015, **48**, 417.
- [S3] (a) A. Weisstuch, P. Neidig and A. C. Testa, *J. Lumin.* 1975, **10**, 137; (b) P. Beak, F. S. Fry, J. Lee and F. Steele, *J. Am. Chem. Soc.* 1976, **98**, 171; (c) S. Hotchandani and A. C. Testa, *J. Chem. Phys.* 1977, **67**, 5201.
- [S4] (a) V. M. Miskowski, H. B. Gray, R. B. Wilson and E. I. Solomon, *Inorg. Chem.* 1979, **18**, 1410; (b) H. Kunkely and A. Vogler, *Inorg. Chem. Commun.* 2004, **7**, 770; (c) T. Lazarides, G. M. Davies, H. Adams, C. Sabatini, F. Barigelletti, A. Barbieri, S. J. A. Pope, S. Faulkner and M. D. Ward, *Photochem. Photobiol. Sci.* 2007, **6**, 1152; (d) J. J. Alexander, H. B. Gray, *Coord. Chem. Rev.* 1967, **2**, 29.
- [S5] (a) Y.-N. Guo, G.-F. Xu, Y. Guo and J. Tang, *Dalton Trans.* 2011, **40**, 9953; (b) M. Ramos Silva, P. Martin-Ramos, J. T. Coutinho, L. C. J. Pereira and J. Martin-Gil, *Dalton Trans.* 2014, **43**, 6752; (c) S. Chorazy, J. Wang and S. Ohkoshi, *Chem. Commun.* 2016, **52**, 10795.
